# Supplementary material for: Comparative Transcriptome Analysis Reveals Effects of Exogenous Hematin on Anthocyanin Biosynthesis during Strawberry Fruit Ripening
Source: Int J Genomics. 2016 Dec 15;2016:6762731. doi: 10.1155/2016/6762731 (PMC5198259; doi:10.1155/2016/6762731)
Supplement: Supplementary file 1 — Figure S1. The anthocyanin content in strawberry fruit was measured after treatment with different concentrations of hematins (0, 1, 10 and 100μM). Vertical bars represent standard errors; Values with different letter are significantly different at p<0.01. Figure S2. Saturation analysis of control 1, control 2, hematin 1, and hematin 2 mRNA libraries. (TIFF); Figure S3. Randomness assessments of control 1, control 2, hematin 1, and hematin 2 mRNA libraries. (TIFF); Table S1. Eleven pairs of gene specific primers of the DEGs in strawberry fruit. Table S2. Gene classification based on gene ontology and pathway terms for DEGs treated by hematin. [file 6762731.f1.zip › supplementary materials/Table S1.xls]

## Sheet: Sheet1
Gene ID	Primer sequence	Product Length	Gene potential function
FANhyb_icon00000237_a.1.g00001.1	F: GGAGCATGATGAAGCAGAAGG	128	DFR
	R: GTTCTTCCTCCACCACAATGC
FANhyb_icon00033172_a.1.g00001.1	F: GGCTTATCTACACCAGTTCC	138	DFR
	R: AGTCCTTGAGCAAGTGATTAG
FANhyb_icon00022113_a.1.g00001.1	F: AGAAGAGTAATGGCTCCAAGG	149	DFR
	R: GTTCCTCAGAAGGCTCACC
FANhyb_rscf00000506.1.g00003.1	F: CTATTCTGGGCTGTTCATCC	124	Chalcone synthase
	R: TGCTAACATTGCCATAGTCC
FANhyb_rscf00000052.1.g00025.1	F: GCAATGGTGGTATCTCAGGAG	130	WD40
	R: CGAATAGAGGTGCTTGATATGC
FANhyb_rscf00000155.1.g00009.1	F: GTAACTCTGGTTGCTTAATGC	147	phytochrome regulatory protein
	R: ACATCACAAGTGCTTCTGC
FANhyb_icon00020138_a.1.g00001.1	F: GGCTGATCCATTGAAGGTTCTG	148	Heavy metal transport
	R: CACGACAACTTTCACCTGAGG
FANhyb_rscf00003075.1.g00001.1	F: TCTCATCGGTTACGGTAGG	149	COP
	R: CGCAGTTTGATTTATTGTTTCC
FANhyb_rscf00000910.1.g00005.1	F: CGGGTTCAGAGTCTTAGG	126	chloroplastic
	R: TTCTCCACAGCCAAATCC
FANhyb_rscf00004244.1.g00001.1	F: CCGCTTTGCTAACCGAATGG	109	Abscisic acid
	R: GTCACGCTCCTCTCATCTCC
FANhyb_rscf00001075.1.g00001.1	F: AGTGGATGTCCTTGATGATGG	144	WRKY
	R: CAATCTTCAGACAGTCGTTCG
FANhyb_rscf00006364.1.g00001.1	F: GGGTCATCTCAGCCTTATCC	107	MYB-related
	R: AGTGTGTCCTCTTCCATTGG
FaACTIN (AB116565.1)	F: TGGGTTTGCTGGAGATGATG		Actin
	R: CACGATTAGCCTTGGGATTC

## Sheet: Sheet2
Gene ID	Primer sequence	Product Length	Gene potential function
FANhyb_icon00002410_a.1.g00001.1	F:GCTACCTTGGTTCTTGGCTTGTGAAG		DFR
	R:GCTACCTTGGTTCTTGGCTTGTGAAG
FANhyb_rscf00004969.1.g00001.1	F:CCTTTCTTGTGGGTGGTTCG		UDP-glucosyltransferase BX9
	R:CCATTGTGAGTCCAGAATAGTCC
FANhyb_icon00027696_a.1.g00001.1	F:CCTATGTAATCTGATGCCTTCC		UDP-glucosyl transferase 73C
	R:GCCTCTTTCTTTGTTTCTTTCC
FANhyb_icon00004395_a.1.g00001.1	F:CATACGAGAGACCAGGCTAAGG		heme oxygenase1
	R:GTATCATACACCAGCTTGCTATCC
FANhyb_rscf00006364.1.g00001.1	F:GGGTCATCTCAGCCTTATCC		MYB
	R:AGTGTGTCCTCTTCCATTGG
FANhyb_rscf00000141.1.g00016.1	F:CATAGGGTTGATGAAACAGATAAGC		MYB
	R:CATAACATTTGGAGCGGAAAGG
FANhyb_icon00006295_a.1.g00001.1	F:ATCGTCGTCGTCCACATCCTCATCC		AP2-EREBP
	R:AGCCAACCTATGTCCACCGTGTCG
FANhyb_rscf00003155.1.g00001.1	F:GAGCATTTCAGTGGAGCGAAGAGAG		AP2-EREBP
	R:CGGAGGTTGATCTGGTTGTTGTGG
FANhyb_icon00001444_a.1.g00001.1	F:CGCAGACGACACCGAAACC		adenylate isopentenyltransferase
	R:CTCCCACCACTTATGATGACTACC
FANhyb_rscf00000295.1.g00003.1	F:GACCAACCAAGAACAAAGAAGAGG		bHLH
	R:TGAAGGTGCTGCTCCAATTCC
FANhyb_rscf00002311.1.g00001.1	F:GCAAGCTCAAGTCCATGTGATAAG		bHLH
	R:TGTTGTTCATGTCCATTCCTATTCC
