# Supplementary material for: Comparative Transcriptome Analysis Reveals Effects of Exogenous Hematin on Anthocyanin Biosynthesis during Strawberry Fruit Ripening
Source: Int J Genomics. 2016 Dec 15;2016:6762731. doi: 10.1155/2016/6762731 (PMC5198259; doi:10.1155/2016/6762731)
Supplement: Supplementary file 1 — Figure S1. The anthocyanin content in strawberry fruit was measured after treatment with different concentrations of hematins (0, 1, 10 and 100μM). Vertical bars represent standard errors; Values with different letter are significantly different at p<0.01. Figure S2. Saturation analysis of control 1, control 2, hematin 1, and hematin 2 mRNA libraries. (TIFF); Figure S3. Randomness assessments of control 1, control 2, hematin 1, and hematin 2 mRNA libraries. (TIFF); Table S1. Eleven pairs of gene specific primers of the DEGs in strawberry fruit. Table S2. Gene classification based on gene ontology and pathway terms for DEGs treated by hematin. [file 6762731.f1.zip › supplementary materials/Table S2.xlsx]

## Sheet: cellular component
The cellular component result
Terms from the Component Ontology with p-value as good or better than 1
Gene Ontology term	Cluster frequency	Genome frequency of use	Corrected P-value
lipid particle (view genes)	2 out of 144 genes, 1.4%	3 out of 5058 genes, 0.1%	0.20855
integral component of plasma membrane (view genes)	3 out of 144 genes, 2.1%	11 out of 5058 genes, 0.2%	0.27743
plasma membrane part (view genes)	7 out of 144 genes, 4.9%	73 out of 5058 genes, 1.4%	0.39081
chloroplast thylakoid membrane (view genes)	7 out of 144 genes, 4.9%	81 out of 5058 genes, 1.6%	0.69089
plastid thylakoid membrane (view genes)	7 out of 144 genes, 4.9%	81 out of 5058 genes, 1.6%	0.69089
intrinsic component of plasma membrane (view genes)	4 out of 144 genes, 2.8%	29 out of 5058 genes, 0.6%	0.75697
thylakoid membrane (view genes)	7 out of 144 genes, 4.9%	92 out of 5058 genes, 1.8%	1
chloroplast thylakoid (view genes)	7 out of 144 genes, 4.9%	99 out of 5058 genes, 2.0%	1
plastid thylakoid (view genes)	7 out of 144 genes, 4.9%	99 out of 5058 genes, 2.0%	1
mediator complex (view genes)	2 out of 144 genes, 1.4%	9 out of 5058 genes, 0.2%	1
organelle subcompartment (view genes)	7 out of 144 genes, 4.9%	102 out of 5058 genes, 2.0%	1
photosynthetic membrane (view genes)	7 out of 144 genes, 4.9%	102 out of 5058 genes, 2.0%	1
chloroplast (view genes)	32 out of 144 genes, 22.2%	819 out of 5058 genes, 16.2%	1
thylakoid part (view genes)	7 out of 144 genes, 4.9%	111 out of 5058 genes, 2.2%	1
chloroplast part (view genes)	16 out of 144 genes, 11.1%	352 out of 5058 genes, 7.0%	1
plastid part (view genes)	16 out of 144 genes, 11.1%	361 out of 5058 genes, 7.1%	1
plastid (view genes)	33 out of 144 genes, 22.9%	888 out of 5058 genes, 17.6%	1
chloroplast stroma (view genes)	9 out of 144 genes, 6.2%	184 out of 5058 genes, 3.6%	1
plastid stroma (view genes)	9 out of 144 genes, 6.2%	190 out of 5058 genes, 3.8%	1
thylakoid (view genes)	7 out of 144 genes, 4.9%	145 out of 5058 genes, 2.9%	1
chloroplast membrane (view genes)	2 out of 144 genes, 1.4%	23 out of 5058 genes, 0.5%	1
plastid membrane (view genes)	2 out of 144 genes, 1.4%	24 out of 5058 genes, 0.5%	1
cell (view genes)	118 out of 144 genes, 81.9%	3953 out of 5058 genes, 78.2%	1
cell part (view genes)	118 out of 144 genes, 81.9%	3953 out of 5058 genes, 78.2%	1
apoplast (view genes)	6 out of 144 genes, 4.2%	144 out of 5058 genes, 2.8%	1
intrinsic component of membrane (view genes)	27 out of 144 genes, 18.8%	828 out of 5058 genes, 16.4%	1
microtubule associated complex (view genes)	2 out of 144 genes, 1.4%	34 out of 5058 genes, 0.7%	1
integral component of membrane (view genes)	26 out of 144 genes, 18.1%	797 out of 5058 genes, 15.8%	1
extracellular region (view genes)	11 out of 144 genes, 7.6%	312 out of 5058 genes, 6.2%	1
plant-type cell wall (view genes)	3 out of 144 genes, 2.1%	70 out of 5058 genes, 1.4%	1
chloroplast envelope (view genes)	6 out of 144 genes, 4.2%	170 out of 5058 genes, 3.4%	1
large ribosomal subunit (view genes)	2 out of 144 genes, 1.4%	44 out of 5058 genes, 0.9%	1
nucleoplasm part (view genes)	2 out of 144 genes, 1.4%	44 out of 5058 genes, 0.9%	1
membrane region (view genes)	2 out of 144 genes, 1.4%	44 out of 5058 genes, 0.9%	1
intracellular (view genes)	102 out of 144 genes, 70.8%	3498 out of 5058 genes, 69.2%	1
nucleoplasm (view genes)	2 out of 144 genes, 1.4%	45 out of 5058 genes, 0.9%	1
plastid envelope (view genes)	6 out of 144 genes, 4.2%	177 out of 5058 genes, 3.5%	1
cell wall (view genes)	7 out of 144 genes, 4.9%	211 out of 5058 genes, 4.2%	1
microtubule (view genes)	2 out of 144 genes, 1.4%	49 out of 5058 genes, 1.0%	1
external encapsulating structure (view genes)	7 out of 144 genes, 4.9%	220 out of 5058 genes, 4.3%	1
cell periphery (view genes)	26 out of 144 genes, 18.1%	905 out of 5058 genes, 17.9%	1
nuclear lumen (view genes)	5 out of 144 genes, 3.5%	170 out of 5058 genes, 3.4%	1
membrane part (view genes)	29 out of 144 genes, 20.1%	1020 out of 5058 genes, 20.2%	1
nuclear part (view genes)	7 out of 144 genes, 4.9%	242 out of 5058 genes, 4.8%	1
intracellular part (view genes)	96 out of 144 genes, 66.7%	3379 out of 5058 genes, 66.8%	1
intracellular organelle part (view genes)	29 out of 144 genes, 20.1%	1041 out of 5058 genes, 20.6%	1
organelle part (view genes)	29 out of 144 genes, 20.1%	1042 out of 5058 genes, 20.6%	1
cytosol (view genes)	10 out of 144 genes, 6.9%	368 out of 5058 genes, 7.3%	1
cytoplasmic membrane-bounded vesicle (view genes)	2 out of 144 genes, 1.4%	73 out of 5058 genes, 1.4%	1
cytoplasmic vesicle (view genes)	2 out of 144 genes, 1.4%	73 out of 5058 genes, 1.4%	1
cytoplasm (view genes)	69 out of 144 genes, 47.9%	2473 out of 5058 genes, 48.9%	1
ribosomal subunit (view genes)	2 out of 144 genes, 1.4%	74 out of 5058 genes, 1.5%	1
organelle lumen (view genes)	5 out of 144 genes, 3.5%	191 out of 5058 genes, 3.8%	1
intracellular organelle lumen (view genes)	5 out of 144 genes, 3.5%	191 out of 5058 genes, 3.8%	1
vesicle (view genes)	2 out of 144 genes, 1.4%	76 out of 5058 genes, 1.5%	1
membrane-bounded vesicle (view genes)	2 out of 144 genes, 1.4%	76 out of 5058 genes, 1.5%	1
intracellular membrane-bounded organelle (view genes)	73 out of 144 genes, 50.7%	2627 out of 5058 genes, 51.9%	1
membrane-enclosed lumen (view genes)	5 out of 144 genes, 3.5%	194 out of 5058 genes, 3.8%	1
membrane-bounded organelle (view genes)	73 out of 144 genes, 50.7%	2630 out of 5058 genes, 52.0%	1
protein complex (view genes)	16 out of 144 genes, 11.1%	606 out of 5058 genes, 12.0%	1
organelle envelope (view genes)	8 out of 144 genes, 5.6%	311 out of 5058 genes, 6.1%	1
plasma membrane (view genes)	19 out of 144 genes, 13.2%	723 out of 5058 genes, 14.3%	1
cytoplasmic part (view genes)	58 out of 144 genes, 40.3%	2121 out of 5058 genes, 41.9%	1
envelope (view genes)	8 out of 144 genes, 5.6%	320 out of 5058 genes, 6.3%	1
nucleus (view genes)	27 out of 144 genes, 18.8%	1025 out of 5058 genes, 20.3%	1
ribosome (view genes)	5 out of 144 genes, 3.5%	207 out of 5058 genes, 4.1%	1
organelle inner membrane (view genes)	2 out of 144 genes, 1.4%	88 out of 5058 genes, 1.7%	1
cytosolic ribosome (view genes)	2 out of 144 genes, 1.4%	88 out of 5058 genes, 1.7%	1
microtubule cytoskeleton (view genes)	2 out of 144 genes, 1.4%	89 out of 5058 genes, 1.8%	1
intracellular organelle (view genes)	78 out of 144 genes, 54.2%	2858 out of 5058 genes, 56.5%	1
organelle (view genes)	78 out of 144 genes, 54.2%	2861 out of 5058 genes, 56.6%	1
cytoskeletal part (view genes)	2 out of 144 genes, 1.4%	96 out of 5058 genes, 1.9%	1
macromolecular complex (view genes)	22 out of 144 genes, 15.3%	870 out of 5058 genes, 17.2%	1
ribonucleoprotein complex (view genes)	6 out of 144 genes, 4.2%	265 out of 5058 genes, 5.2%	1
cytosolic part (view genes)	2 out of 144 genes, 1.4%	106 out of 5058 genes, 2.1%	1
non-membrane-bounded organelle (view genes)	11 out of 144 genes, 7.6%	483 out of 5058 genes, 9.5%	1
intracellular non-membrane-bounded organelle (view genes)	11 out of 144 genes, 7.6%	483 out of 5058 genes, 9.5%	1
mitochondrion (view genes)	10 out of 144 genes, 6.9%	457 out of 5058 genes, 9.0%	1
nucleolus (view genes)	2 out of 144 genes, 1.4%	117 out of 5058 genes, 2.3%	1
cytoskeleton (view genes)	2 out of 144 genes, 1.4%	122 out of 5058 genes, 2.4%	1
organelle membrane (view genes)	4 out of 144 genes, 2.8%	259 out of 5058 genes, 5.1%	1
bounding membrane of organelle (view genes)	2 out of 144 genes, 1.4%	160 out of 5058 genes, 3.2%	1
vacuole (view genes)	3 out of 144 genes, 2.1%	218 out of 5058 genes, 4.3%	1
membrane (view genes)	56 out of 144 genes, 38.9%	2316 out of 5058 genes, 45.8%	1
endoplasmic reticulum (view genes)	2 out of 144 genes, 1.4%	176 out of 5058 genes, 3.5%	1
Golgi apparatus (view genes)	2 out of 144 genes, 1.4%	195 out of 5058 genes, 3.9%	1
catalytic complex (view genes)	2 out of 144 genes, 1.4%	198 out of 5058 genes, 3.9%	1
endomembrane system (view genes)	5 out of 144 genes, 3.5%	409 out of 5058 genes, 8.1%	1

## Sheet: molecular function
The molecular function result
Terms from the Function Ontology with p-value as good or better than 1
Gene Ontology term	Cluster frequency	Genome frequency of use	Corrected P-value
sucrose transmembrane transporter activity (view genes)	3 out of 249 genes, 1.2%	7 out of 8847 genes, 0.1%	0.12974
disaccharide transmembrane transporter activity (view genes)	3 out of 249 genes, 1.2%	7 out of 8847 genes, 0.1%	0.12974
oligosaccharide transmembrane transporter activity (view genes)	3 out of 249 genes, 1.2%	7 out of 8847 genes, 0.1%	0.12974
alkane 1-monooxygenase activity (view genes)	3 out of 249 genes, 1.2%	7 out of 8847 genes, 0.1%	0.12974
calcium-dependent cysteine-type endopeptidase activity (view genes)	2 out of 249 genes, 0.8%	2 out of 8847 genes, 0.0%	0.14439
oxidoreductase activity, acting on paired donors, with incorporation or reduction of molecular oxygen, reduced iron-sulfur protein as one donor, and incorporation of one atom of oxygen (view genes)	3 out of 249 genes, 1.2%	8 out of 8847 genes, 0.1%	0.20327
cation binding (view genes)	59 out of 249 genes, 23.7%	1445 out of 8847 genes, 16.3%	0.2733
metal ion binding (view genes)	58 out of 249 genes, 23.3%	1419 out of 8847 genes, 16.0%	0.29541
cysteine-type endopeptidase activity (view genes)	3 out of 249 genes, 1.2%	10 out of 8847 genes, 0.1%	0.41774
NAD+ binding (view genes)	2 out of 249 genes, 0.8%	3 out of 8847 genes, 0.0%	0.42512
monooxygenase activity (view genes)	13 out of 249 genes, 5.2%	189 out of 8847 genes, 2.1%	0.47428
peroxiredoxin activity (view genes)	3 out of 249 genes, 1.2%	11 out of 8847 genes, 0.1%	0.56252
oxidoreductase activity, acting on diphenols and related substances as donors, oxygen as acceptor (view genes)	5 out of 249 genes, 2.0%	41 out of 8847 genes, 0.5%	1
L-ascorbate oxidase activity (view genes)	4 out of 249 genes, 1.6%	26 out of 8847 genes, 0.3%	1
oxidoreductase activity, acting on diphenols and related substances as donors (view genes)	5 out of 249 genes, 2.0%	48 out of 8847 genes, 0.5%	1
phosphogluconate dehydrogenase (decarboxylating) activity (view genes)	2 out of 249 genes, 0.8%	6 out of 8847 genes, 0.1%	1
ribulose-bisphosphate carboxylase activity (view genes)	2 out of 249 genes, 0.8%	6 out of 8847 genes, 0.1%	1
transition metal ion binding (view genes)	33 out of 249 genes, 13.3%	780 out of 8847 genes, 8.8%	1
heat shock protein binding (view genes)	3 out of 249 genes, 1.2%	18 out of 8847 genes, 0.2%	1
RNA polymerase II transcription factor binding transcription factor activity (view genes)	2 out of 249 genes, 0.8%	7 out of 8847 genes, 0.1%	1
RNA polymerase II transcription cofactor activity (view genes)	2 out of 249 genes, 0.8%	7 out of 8847 genes, 0.1%	1
oxidoreductase activity, acting on paired donors, with incorporation or reduction of molecular oxygen, reduced flavin or flavoprotein as one donor, and incorporation of one atom of oxygen (view genes)	3 out of 249 genes, 1.2%	20 out of 8847 genes, 0.2%	1
aromatase activity (view genes)	3 out of 249 genes, 1.2%	20 out of 8847 genes, 0.2%	1
mismatched DNA binding (view genes)	2 out of 249 genes, 0.8%	8 out of 8847 genes, 0.1%	1
sugar transmembrane transporter activity (view genes)	3 out of 249 genes, 1.2%	21 out of 8847 genes, 0.2%	1
chitinase activity (view genes)	2 out of 249 genes, 0.8%	9 out of 8847 genes, 0.1%	1
carbohydrate transmembrane transporter activity (view genes)	3 out of 249 genes, 1.2%	24 out of 8847 genes, 0.3%	1
carbohydrate transporter activity (view genes)	3 out of 249 genes, 1.2%	24 out of 8847 genes, 0.3%	1
oxo-acid-lyase activity (view genes)	2 out of 249 genes, 0.8%	10 out of 8847 genes, 0.1%	1
carboxylic acid binding (view genes)	3 out of 249 genes, 1.2%	25 out of 8847 genes, 0.3%	1
organic acid binding (view genes)	3 out of 249 genes, 1.2%	25 out of 8847 genes, 0.3%	1
endopeptidase activity (view genes)	9 out of 249 genes, 3.6%	159 out of 8847 genes, 1.8%	1
iron ion binding (view genes)	10 out of 249 genes, 4.0%	187 out of 8847 genes, 2.1%	1
oxidoreductase activity (view genes)	49 out of 249 genes, 19.7%	1378 out of 8847 genes, 15.6%	1
transcription factor binding transcription factor activity (view genes)	2 out of 249 genes, 0.8%	13 out of 8847 genes, 0.1%	1
double-stranded DNA binding (view genes)	2 out of 249 genes, 0.8%	13 out of 8847 genes, 0.1%	1
transcription cofactor activity (view genes)	2 out of 249 genes, 0.8%	13 out of 8847 genes, 0.1%	1
copper ion binding (view genes)	7 out of 249 genes, 2.8%	120 out of 8847 genes, 1.4%	1
electron carrier activity (view genes)	10 out of 249 genes, 4.0%	205 out of 8847 genes, 2.3%	1
protein binding transcription factor activity (view genes)	2 out of 249 genes, 0.8%	15 out of 8847 genes, 0.2%	1
amino acid binding (view genes)	2 out of 249 genes, 0.8%	15 out of 8847 genes, 0.2%	1
ion binding (view genes)	91 out of 249 genes, 36.5%	2831 out of 8847 genes, 32.0%	1
heme binding (view genes)	9 out of 249 genes, 3.6%	186 out of 8847 genes, 2.1%	1
cysteine-type peptidase activity (view genes)	3 out of 249 genes, 1.2%	36 out of 8847 genes, 0.4%	1
oxidoreductase activity, acting on paired donors, with incorporation or reduction of molecular oxygen (view genes)	12 out of 249 genes, 4.8%	272 out of 8847 genes, 3.1%	1
oxidoreductase activity, acting on paired donors, with incorporation or reduction of molecular oxygen, NAD(P)H as one donor, and incorporation of one atom of oxygen (view genes)	4 out of 249 genes, 1.6%	61 out of 8847 genes, 0.7%	1
tetrapyrrole binding (view genes)	9 out of 249 genes, 3.6%	192 out of 8847 genes, 2.2%	1
structure-specific DNA binding (view genes)	2 out of 249 genes, 0.8%	19 out of 8847 genes, 0.2%	1
NAD binding (view genes)	3 out of 249 genes, 1.2%	40 out of 8847 genes, 0.5%	1
fatty acid synthase activity (view genes)	2 out of 249 genes, 0.8%	22 out of 8847 genes, 0.2%	1
transferase activity, transferring glycosyl groups (view genes)	15 out of 249 genes, 6.0%	390 out of 8847 genes, 4.4%	1
lyase activity (view genes)	11 out of 249 genes, 4.4%	274 out of 8847 genes, 3.1%	1
thiolester hydrolase activity (view genes)	2 out of 249 genes, 0.8%	25 out of 8847 genes, 0.3%	1
DNA-directed RNA polymerase activity (view genes)	2 out of 249 genes, 0.8%	29 out of 8847 genes, 0.3%	1
endonuclease activity (view genes)	2 out of 249 genes, 0.8%	29 out of 8847 genes, 0.3%	1
peptidase activity, acting on L-amino acid peptides (view genes)	11 out of 249 genes, 4.4%	291 out of 8847 genes, 3.3%	1
hydrolase activity, hydrolyzing O-glycosyl compounds (view genes)	11 out of 249 genes, 4.4%	293 out of 8847 genes, 3.3%	1
microtubule motor activity (view genes)	2 out of 249 genes, 0.8%	31 out of 8847 genes, 0.4%	1
metalloendopeptidase activity (view genes)	2 out of 249 genes, 0.8%	31 out of 8847 genes, 0.4%	1
nucleic acid binding transcription factor activity (view genes)	6 out of 249 genes, 2.4%	144 out of 8847 genes, 1.6%	1
sequence-specific DNA binding transcription factor activity (view genes)	6 out of 249 genes, 2.4%	144 out of 8847 genes, 1.6%	1
zinc ion binding (view genes)	15 out of 249 genes, 6.0%	427 out of 8847 genes, 4.8%	1
sequence-specific DNA binding (view genes)	4 out of 249 genes, 1.6%	86 out of 8847 genes, 1.0%	1
oxidoreductase activity, acting on peroxide as acceptor (view genes)	4 out of 249 genes, 1.6%	87 out of 8847 genes, 1.0%	1
peptidase activity (view genes)	12 out of 249 genes, 4.8%	341 out of 8847 genes, 3.9%	1
metallopeptidase activity (view genes)	3 out of 249 genes, 1.2%	62 out of 8847 genes, 0.7%	1
motor activity (view genes)	2 out of 249 genes, 0.8%	35 out of 8847 genes, 0.4%	1
carbon-carbon lyase activity (view genes)	4 out of 249 genes, 1.6%	93 out of 8847 genes, 1.1%	1
oxidoreductase activity, acting on single donors with incorporation of molecular oxygen (view genes)	3 out of 249 genes, 1.2%	65 out of 8847 genes, 0.7%	1
RNA polymerase activity (view genes)	2 out of 249 genes, 0.8%	37 out of 8847 genes, 0.4%	1
oxidoreductase activity, acting on single donors with incorporation of molecular oxygen, incorporation of two atoms of oxygen (view genes)	2 out of 249 genes, 0.8%	40 out of 8847 genes, 0.5%	1
aspartic-type endopeptidase activity (view genes)	2 out of 249 genes, 0.8%	41 out of 8847 genes, 0.5%	1
beta-glucosidase activity (view genes)	2 out of 249 genes, 0.8%	41 out of 8847 genes, 0.5%	1
aspartic-type peptidase activity (view genes)	2 out of 249 genes, 0.8%	41 out of 8847 genes, 0.5%	1
exonuclease activity (view genes)	2 out of 249 genes, 0.8%	42 out of 8847 genes, 0.5%	1
ion channel activity (view genes)	2 out of 249 genes, 0.8%	42 out of 8847 genes, 0.5%	1
antioxidant activity (view genes)	4 out of 249 genes, 1.6%	105 out of 8847 genes, 1.2%	1
hydrolase activity, acting on glycosyl bonds (view genes)	11 out of 249 genes, 4.4%	339 out of 8847 genes, 3.8%	1
nuclease activity (view genes)	3 out of 249 genes, 1.2%	76 out of 8847 genes, 0.9%	1
binding (view genes)	141 out of 249 genes, 56.6%	4895 out of 8847 genes, 55.3%	1
DNA binding (view genes)	16 out of 249 genes, 6.4%	511 out of 8847 genes, 5.8%	1
phosphoric diester hydrolase activity (view genes)	2 out of 249 genes, 0.8%	46 out of 8847 genes, 0.5%	1
nucleotidyltransferase activity (view genes)	5 out of 249 genes, 2.0%	144 out of 8847 genes, 1.6%	1
dioxygenase activity (view genes)	4 out of 249 genes, 1.6%	115 out of 8847 genes, 1.3%	1
UDP-glycosyltransferase activity (view genes)	5 out of 249 genes, 2.0%	149 out of 8847 genes, 1.7%	1
coenzyme binding (view genes)	8 out of 249 genes, 3.2%	251 out of 8847 genes, 2.8%	1
translation initiation factor activity (view genes)	2 out of 249 genes, 0.8%	50 out of 8847 genes, 0.6%	1
channel activity (view genes)	2 out of 249 genes, 0.8%	50 out of 8847 genes, 0.6%	1
passive transmembrane transporter activity (view genes)	2 out of 249 genes, 0.8%	50 out of 8847 genes, 0.6%	1
substrate-specific channel activity (view genes)	2 out of 249 genes, 0.8%	50 out of 8847 genes, 0.6%	1
NADP binding (view genes)	2 out of 249 genes, 0.8%	52 out of 8847 genes, 0.6%	1
peroxidase activity (view genes)	3 out of 249 genes, 1.2%	86 out of 8847 genes, 1.0%	1
oxidoreductase activity, acting on CH-OH group of donors (view genes)	6 out of 249 genes, 2.4%	189 out of 8847 genes, 2.1%	1
carboxy-lyase activity (view genes)	2 out of 249 genes, 0.8%	54 out of 8847 genes, 0.6%	1
transferase activity, transferring acyl groups (view genes)	6 out of 249 genes, 2.4%	193 out of 8847 genes, 2.2%	1
oxidoreductase activity, acting on the CH-OH group of donors, NAD or NADP as acceptor (view genes)	5 out of 249 genes, 2.0%	163 out of 8847 genes, 1.8%	1
serine-type endopeptidase activity (view genes)	2 out of 249 genes, 0.8%	58 out of 8847 genes, 0.7%	1
glucosidase activity (view genes)	2 out of 249 genes, 0.8%	58 out of 8847 genes, 0.7%	1
transmembrane transporter activity (view genes)	14 out of 249 genes, 5.6%	484 out of 8847 genes, 5.5%	1
magnesium ion binding (view genes)	2 out of 249 genes, 0.8%	59 out of 8847 genes, 0.7%	1
unfolded protein binding (view genes)	2 out of 249 genes, 0.8%	59 out of 8847 genes, 0.7%	1
cofactor binding (view genes)	11 out of 249 genes, 4.4%	378 out of 8847 genes, 4.3%	1
flavin adenine dinucleotide binding (view genes)	3 out of 249 genes, 1.2%	98 out of 8847 genes, 1.1%	1
substrate-specific transmembrane transporter activity (view genes)	11 out of 249 genes, 4.4%	387 out of 8847 genes, 4.4%	1
oxidoreductase activity, acting on the CH-CH group of donors, NAD or NADP as acceptor (view genes)	5 out of 249 genes, 2.0%	174 out of 8847 genes, 2.0%	1
transporter activity (view genes)	17 out of 249 genes, 6.8%	620 out of 8847 genes, 7.0%	1
pyridoxal phosphate binding (view genes)	3 out of 249 genes, 1.2%	109 out of 8847 genes, 1.2%	1
2-alkenal reductase [NAD(P)] activity (view genes)	4 out of 249 genes, 1.6%	147 out of 8847 genes, 1.7%	1
hydrogen ion transmembrane transporter activity (view genes)	2 out of 249 genes, 0.8%	73 out of 8847 genes, 0.8%	1
iron-sulfur cluster binding (view genes)	2 out of 249 genes, 0.8%	73 out of 8847 genes, 0.8%	1
metal cluster binding (view genes)	2 out of 249 genes, 0.8%	73 out of 8847 genes, 0.8%	1
calcium ion binding (view genes)	4 out of 249 genes, 1.6%	150 out of 8847 genes, 1.7%	1
primary active transmembrane transporter activity (view genes)	4 out of 249 genes, 1.6%	150 out of 8847 genes, 1.7%	1
P-P-bond-hydrolysis-driven transmembrane transporter activity (view genes)	4 out of 249 genes, 1.6%	150 out of 8847 genes, 1.7%	1
transferase activity, transferring hexosyl groups (view genes)	7 out of 249 genes, 2.8%	265 out of 8847 genes, 3.0%	1
serine-type peptidase activity (view genes)	3 out of 249 genes, 1.2%	117 out of 8847 genes, 1.3%	1
serine hydrolase activity (view genes)	3 out of 249 genes, 1.2%	117 out of 8847 genes, 1.3%	1
translation factor activity, nucleic acid binding (view genes)	2 out of 249 genes, 0.8%	79 out of 8847 genes, 0.9%	1
substrate-specific transporter activity (view genes)	11 out of 249 genes, 4.4%	428 out of 8847 genes, 4.8%	1
isomerase activity (view genes)	4 out of 249 genes, 1.6%	166 out of 8847 genes, 1.9%	1
oxidoreductase activity, acting on the CH-CH group of donors (view genes)	5 out of 249 genes, 2.0%	208 out of 8847 genes, 2.4%	1
oxidoreductase activity, acting on paired donors, with incorporation or reduction of molecular oxygen, 2-oxoglutarate as one donor, and incorporation of one atom each of oxygen into both donors (view genes)	2 out of 249 genes, 0.8%	87 out of 8847 genes, 1.0%	1
transferase activity, transferring acyl groups other than amino-acyl groups (view genes)	3 out of 249 genes, 1.2%	135 out of 8847 genes, 1.5%	1
UDP-glucosyltransferase activity (view genes)	2 out of 249 genes, 0.8%	93 out of 8847 genes, 1.1%	1
ATPase activity, coupled to transmembrane movement of substances (view genes)	3 out of 249 genes, 1.2%	137 out of 8847 genes, 1.5%	1
ATPase activity, coupled to movement of substances (view genes)	3 out of 249 genes, 1.2%	137 out of 8847 genes, 1.5%	1
carbohydrate binding (view genes)	2 out of 249 genes, 0.8%	94 out of 8847 genes, 1.1%	1
helicase activity (view genes)	3 out of 249 genes, 1.2%	138 out of 8847 genes, 1.6%	1
pyrophosphatase activity (view genes)	14 out of 249 genes, 5.6%	575 out of 8847 genes, 6.5%	1
hydrolase activity (view genes)	54 out of 249 genes, 21.7%	2066 out of 8847 genes, 23.4%	1
hydrolase activity, acting on acid anhydrides, in phosphorus-containing anhydrides (view genes)	14 out of 249 genes, 5.6%	578 out of 8847 genes, 6.5%	1
hydrolase activity, acting on acid anhydrides, catalyzing transmembrane movement of substances (view genes)	3 out of 249 genes, 1.2%	140 out of 8847 genes, 1.6%	1
carbon-oxygen lyase activity (view genes)	2 out of 249 genes, 0.8%	97 out of 8847 genes, 1.1%	1
glucosyltransferase activity (view genes)	2 out of 249 genes, 0.8%	97 out of 8847 genes, 1.1%	1
catalytic activity (view genes)	173 out of 249 genes, 69.5%	6309 out of 8847 genes, 71.3%	1
ATPase activity, coupled to transmembrane movement of ions (view genes)	2 out of 249 genes, 0.8%	100 out of 8847 genes, 1.1%	1
hydrolase activity, acting on acid anhydrides (view genes)	14 out of 249 genes, 5.6%	588 out of 8847 genes, 6.6%	1
nucleoside-triphosphatase activity (view genes)	13 out of 249 genes, 5.2%	550 out of 8847 genes, 6.2%	1
nucleic acid binding (view genes)	27 out of 249 genes, 10.8%	1105 out of 8847 genes, 12.5%	1
structural molecule activity (view genes)	4 out of 249 genes, 1.6%	199 out of 8847 genes, 2.2%	1
ion transmembrane transporter activity (view genes)	7 out of 249 genes, 2.8%	326 out of 8847 genes, 3.7%	1
structural constituent of ribosome (view genes)	3 out of 249 genes, 1.2%	157 out of 8847 genes, 1.8%	1
monovalent inorganic cation transmembrane transporter activity (view genes)	2 out of 249 genes, 0.8%	112 out of 8847 genes, 1.3%	1
anion transmembrane transporter activity (view genes)	2 out of 249 genes, 0.8%	113 out of 8847 genes, 1.3%	1
inorganic cation transmembrane transporter activity (view genes)	3 out of 249 genes, 1.2%	166 out of 8847 genes, 1.9%	1
signal transducer activity (view genes)	2 out of 249 genes, 0.8%	122 out of 8847 genes, 1.4%	1
molecular transducer activity (view genes)	2 out of 249 genes, 0.8%	122 out of 8847 genes, 1.4%	1
hydrolase activity, acting on ester bonds (view genes)	10 out of 249 genes, 4.0%	480 out of 8847 genes, 5.4%	1
phosphotransferase activity, alcohol group as acceptor (view genes)	18 out of 249 genes, 7.2%	805 out of 8847 genes, 9.1%	1
RNA binding (view genes)	6 out of 249 genes, 2.4%	314 out of 8847 genes, 3.5%	1
ATPase activity, coupled (view genes)	5 out of 249 genes, 2.0%	271 out of 8847 genes, 3.1%	1
phosphoric ester hydrolase activity (view genes)	4 out of 249 genes, 1.6%	227 out of 8847 genes, 2.6%	1
ATPase activity (view genes)	6 out of 249 genes, 2.4%	317 out of 8847 genes, 3.6%	1
transferase activity, transferring one-carbon groups (view genes)	3 out of 249 genes, 1.2%	186 out of 8847 genes, 2.1%	1
anion binding (view genes)	37 out of 249 genes, 14.9%	1570 out of 8847 genes, 17.7%	1
transferase activity (view genes)	58 out of 249 genes, 23.3%	2395 out of 8847 genes, 27.1%	1
active transmembrane transporter activity (view genes)	4 out of 249 genes, 1.6%	251 out of 8847 genes, 2.8%	1
guanyl nucleotide binding (view genes)	2 out of 249 genes, 0.8%	150 out of 8847 genes, 1.7%	1
ATP binding (view genes)	24 out of 249 genes, 9.6%	1114 out of 8847 genes, 12.6%	1
adenyl ribonucleotide binding (view genes)	24 out of 249 genes, 9.6%	1120 out of 8847 genes, 12.7%	1
adenyl nucleotide binding (view genes)	24 out of 249 genes, 9.6%	1122 out of 8847 genes, 12.7%	1
cation transmembrane transporter activity (view genes)	3 out of 249 genes, 1.2%	221 out of 8847 genes, 2.5%	1
carbohydrate derivative binding (view genes)	28 out of 249 genes, 11.2%	1296 out of 8847 genes, 14.6%	1
protein kinase activity (view genes)	13 out of 249 genes, 5.2%	684 out of 8847 genes, 7.7%	1
methyltransferase activity (view genes)	2 out of 249 genes, 0.8%	173 out of 8847 genes, 2.0%	1
phosphatase activity (view genes)	2 out of 249 genes, 0.8%	173 out of 8847 genes, 2.0%	1
purine nucleotide binding (view genes)	27 out of 249 genes, 10.8%	1272 out of 8847 genes, 14.4%	1
small molecule binding (view genes)	48 out of 249 genes, 19.3%	2095 out of 8847 genes, 23.7%	1
nucleoside binding (view genes)	27 out of 249 genes, 10.8%	1276 out of 8847 genes, 14.4%	1
ribonucleoside binding (view genes)	27 out of 249 genes, 10.8%	1276 out of 8847 genes, 14.4%	1
transferase activity, transferring phosphorus-containing groups (view genes)	26 out of 249 genes, 10.4%	1254 out of 8847 genes, 14.2%	1
heterocyclic compound binding (view genes)	78 out of 249 genes, 31.3%	3246 out of 8847 genes, 36.7%	1
organic cyclic compound binding (view genes)	78 out of 249 genes, 31.3%	3248 out of 8847 genes, 36.7%	1
purine ribonucleoside triphosphate binding (view genes)	26 out of 249 genes, 10.4%	1261 out of 8847 genes, 14.3%	1
kinase activity (view genes)	19 out of 249 genes, 7.6%	975 out of 8847 genes, 11.0%	1
purine nucleoside binding (view genes)	26 out of 249 genes, 10.4%	1266 out of 8847 genes, 14.3%	1
purine ribonucleoside binding (view genes)	26 out of 249 genes, 10.4%	1266 out of 8847 genes, 14.3%	1
purine ribonucleotide binding (view genes)	26 out of 249 genes, 10.4%	1267 out of 8847 genes, 14.3%	1
protein serine/threonine kinase activity (view genes)	6 out of 249 genes, 2.4%	410 out of 8847 genes, 4.6%	1
ribonucleotide binding (view genes)	26 out of 249 genes, 10.4%	1284 out of 8847 genes, 14.5%	1
nucleotide binding (view genes)	44 out of 249 genes, 17.7%	2043 out of 8847 genes, 23.1%	1
nucleoside phosphate binding (view genes)	44 out of 249 genes, 17.7%	2043 out of 8847 genes, 23.1%	1
protein binding (view genes)	7 out of 249 genes, 2.8%	535 out of 8847 genes, 6.0%	1

## Sheet: biological progerss
The biological progress result
Terms from the Process Ontology with p-value as good or better than 1
Gene Ontology term	Cluster frequency	Genome frequency of use	Corrected P-value
anatomical structure arrangement (view genes)	8 out of 211 genes, 3.8%	29 out of 7570 genes, 0.4%	0.00045
meristem structural organization (view genes)	7 out of 211 genes, 3.3%	28 out of 7570 genes, 0.4%	0.00473
radial pattern formation (view genes)	3 out of 211 genes, 1.4%	4 out of 7570 genes, 0.1%	0.04651
meristem development (view genes)	8 out of 211 genes, 3.8%	68 out of 7570 genes, 0.9%	0.3114
disaccharide transport (view genes)	3 out of 211 genes, 1.4%	7 out of 7570 genes, 0.1%	0.38243
sucrose transport (view genes)	3 out of 211 genes, 1.4%	7 out of 7570 genes, 0.1%	0.38243
oligosaccharide transport (view genes)	3 out of 211 genes, 1.4%	7 out of 7570 genes, 0.1%	0.38243
pattern specification process (view genes)	7 out of 211 genes, 3.3%	55 out of 7570 genes, 0.7%	0.4284
response to carbohydrate (view genes)	5 out of 211 genes, 2.4%	30 out of 7570 genes, 0.4%	0.7198
regionalization (view genes)	6 out of 211 genes, 2.8%	46 out of 7570 genes, 0.6%	0.89642
suberin biosynthetic process (view genes)	2 out of 211 genes, 0.9%	3 out of 7570 genes, 0.0%	1
reproduction (view genes)	8 out of 211 genes, 3.8%	88 out of 7570 genes, 1.2%	1
meristem initiation (view genes)	3 out of 211 genes, 1.4%	12 out of 7570 genes, 0.2%	1
cell wall macromolecule catabolic process (view genes)	3 out of 211 genes, 1.4%	12 out of 7570 genes, 0.2%	1
regulation of flower development (view genes)	5 out of 211 genes, 2.4%	41 out of 7570 genes, 0.5%	1
regulation of reproductive process (view genes)	5 out of 211 genes, 2.4%	44 out of 7570 genes, 0.6%	1
organ development (view genes)	14 out of 211 genes, 6.6%	241 out of 7570 genes, 3.2%	1
nucleic acid phosphodiester bond hydrolysis (view genes)	4 out of 211 genes, 1.9%	29 out of 7570 genes, 0.4%	1
response to temperature stimulus (view genes)	10 out of 211 genes, 4.7%	154 out of 7570 genes, 2.0%	1
aminoglycan catabolic process (view genes)	2 out of 211 genes, 0.9%	6 out of 7570 genes, 0.1%	1
chitin metabolic process (view genes)	2 out of 211 genes, 0.9%	6 out of 7570 genes, 0.1%	1
chitin catabolic process (view genes)	2 out of 211 genes, 0.9%	6 out of 7570 genes, 0.1%	1
amino sugar catabolic process (view genes)	2 out of 211 genes, 0.9%	6 out of 7570 genes, 0.1%	1
glucosamine-containing compound metabolic process (view genes)	2 out of 211 genes, 0.9%	6 out of 7570 genes, 0.1%	1
glucosamine-containing compound catabolic process (view genes)	2 out of 211 genes, 0.9%	6 out of 7570 genes, 0.1%	1
tissue development (view genes)	8 out of 211 genes, 3.8%	109 out of 7570 genes, 1.4%	1
regulation of shoot system development (view genes)	5 out of 211 genes, 2.4%	49 out of 7570 genes, 0.6%	1
plastid membrane organization (view genes)	3 out of 211 genes, 1.4%	18 out of 7570 genes, 0.2%	1
thylakoid membrane organization (view genes)	3 out of 211 genes, 1.4%	18 out of 7570 genes, 0.2%	1
organ morphogenesis (view genes)	5 out of 211 genes, 2.4%	52 out of 7570 genes, 0.7%	1
mitotic recombination (view genes)	2 out of 211 genes, 0.9%	7 out of 7570 genes, 0.1%	1
response to freezing (view genes)	2 out of 211 genes, 0.9%	7 out of 7570 genes, 0.1%	1
organic hydroxy compound catabolic process (view genes)	2 out of 211 genes, 0.9%	7 out of 7570 genes, 0.1%	1
seed maturation (view genes)	3 out of 211 genes, 1.4%	19 out of 7570 genes, 0.3%	1
oxidation-reduction process (view genes)	42 out of 211 genes, 19.9%	1085 out of 7570 genes, 14.3%	1
anatomical structure morphogenesis (view genes)	13 out of 211 genes, 6.2%	238 out of 7570 genes, 3.1%	1
phenylpropanoid biosynthetic process (view genes)	3 out of 211 genes, 1.4%	20 out of 7570 genes, 0.3%	1
xylem and phloem pattern formation (view genes)	3 out of 211 genes, 1.4%	20 out of 7570 genes, 0.3%	1
polyol metabolic process (view genes)	3 out of 211 genes, 1.4%	20 out of 7570 genes, 0.3%	1
cell wall macromolecule metabolic process (view genes)	4 out of 211 genes, 1.9%	36 out of 7570 genes, 0.5%	1
regulation of multicellular organismal process (view genes)	8 out of 211 genes, 3.8%	119 out of 7570 genes, 1.6%	1
leaf development (view genes)	5 out of 211 genes, 2.4%	56 out of 7570 genes, 0.7%	1
aminoglycan metabolic process (view genes)	2 out of 211 genes, 0.9%	8 out of 7570 genes, 0.1%	1
mismatch repair (view genes)	2 out of 211 genes, 0.9%	8 out of 7570 genes, 0.1%	1
carbohydrate mediated signaling (view genes)	2 out of 211 genes, 0.9%	8 out of 7570 genes, 0.1%	1
sugar mediated signaling pathway (view genes)	2 out of 211 genes, 0.9%	8 out of 7570 genes, 0.1%	1
lipid storage (view genes)	2 out of 211 genes, 0.9%	8 out of 7570 genes, 0.1%	1
cellular response to carbohydrate stimulus (view genes)	2 out of 211 genes, 0.9%	8 out of 7570 genes, 0.1%	1
regulation of developmental process (view genes)	9 out of 211 genes, 4.3%	145 out of 7570 genes, 1.9%	1
leaf morphogenesis (view genes)	3 out of 211 genes, 1.4%	22 out of 7570 genes, 0.3%	1
glycerol metabolic process (view genes)	2 out of 211 genes, 0.9%	9 out of 7570 genes, 0.1%	1
inflorescence development (view genes)	2 out of 211 genes, 0.9%	9 out of 7570 genes, 0.1%	1
carbon fixation (view genes)	2 out of 211 genes, 0.9%	9 out of 7570 genes, 0.1%	1
alditol metabolic process (view genes)	2 out of 211 genes, 0.9%	9 out of 7570 genes, 0.1%	1
response to abiotic stimulus (view genes)	22 out of 211 genes, 10.4%	508 out of 7570 genes, 6.7%	1
regulation of post-embryonic development (view genes)	5 out of 211 genes, 2.4%	62 out of 7570 genes, 0.8%	1
amino sugar metabolic process (view genes)	2 out of 211 genes, 0.9%	10 out of 7570 genes, 0.1%	1
cell adhesion (view genes)	2 out of 211 genes, 0.9%	10 out of 7570 genes, 0.1%	1
specification of symmetry (view genes)	2 out of 211 genes, 0.9%	10 out of 7570 genes, 0.1%	1
determination of bilateral symmetry (view genes)	2 out of 211 genes, 0.9%	10 out of 7570 genes, 0.1%	1
biological adhesion (view genes)	2 out of 211 genes, 0.9%	10 out of 7570 genes, 0.1%	1
multicellular organism reproduction (view genes)	4 out of 211 genes, 1.9%	43 out of 7570 genes, 0.6%	1
regulation of cell differentiation (view genes)	3 out of 211 genes, 1.4%	26 out of 7570 genes, 0.3%	1
response to cold (view genes)	6 out of 211 genes, 2.8%	88 out of 7570 genes, 1.2%	1
regulation of transcription from RNA polymerase II promoter (view genes)	2 out of 211 genes, 0.9%	11 out of 7570 genes, 0.1%	1
cotyledon development (view genes)	2 out of 211 genes, 0.9%	11 out of 7570 genes, 0.1%	1
regulation of multicellular organismal development (view genes)	7 out of 211 genes, 3.3%	112 out of 7570 genes, 1.5%	1
phenylpropanoid metabolic process (view genes)	4 out of 211 genes, 1.9%	46 out of 7570 genes, 0.6%	1
regulation of biological quality (view genes)	12 out of 211 genes, 5.7%	243 out of 7570 genes, 3.2%	1
root system development (view genes)	7 out of 211 genes, 3.3%	115 out of 7570 genes, 1.5%	1
root development (view genes)	7 out of 211 genes, 3.3%	115 out of 7570 genes, 1.5%	1
carbohydrate metabolic process (view genes)	28 out of 211 genes, 13.3%	717 out of 7570 genes, 9.5%	1
stem cell maintenance (view genes)	2 out of 211 genes, 0.9%	12 out of 7570 genes, 0.2%	1
cell fate commitment (view genes)	2 out of 211 genes, 0.9%	12 out of 7570 genes, 0.2%	1
stem cell differentiation (view genes)	2 out of 211 genes, 0.9%	12 out of 7570 genes, 0.2%	1
stem cell development (view genes)	2 out of 211 genes, 0.9%	12 out of 7570 genes, 0.2%	1
regulation of nitrogen compound metabolic process (view genes)	17 out of 211 genes, 8.1%	390 out of 7570 genes, 5.2%	1
shoot system morphogenesis (view genes)	4 out of 211 genes, 1.9%	49 out of 7570 genes, 0.6%	1
regulation of hormone levels (view genes)	6 out of 211 genes, 2.8%	94 out of 7570 genes, 1.2%	1
telomere maintenance (view genes)	2 out of 211 genes, 0.9%	13 out of 7570 genes, 0.2%	1
telomere organization (view genes)	2 out of 211 genes, 0.9%	13 out of 7570 genes, 0.2%	1
anatomical structure homeostasis (view genes)	2 out of 211 genes, 0.9%	13 out of 7570 genes, 0.2%	1
sister chromatid cohesion (view genes)	3 out of 211 genes, 1.4%	30 out of 7570 genes, 0.4%	1
negative regulation of developmental process (view genes)	3 out of 211 genes, 1.4%	30 out of 7570 genes, 0.4%	1
double-strand break repair (view genes)	3 out of 211 genes, 1.4%	31 out of 7570 genes, 0.4%	1
glucose metabolic process (view genes)	5 out of 211 genes, 2.4%	74 out of 7570 genes, 1.0%	1
response to auxin (view genes)	5 out of 211 genes, 2.4%	74 out of 7570 genes, 1.0%	1
root morphogenesis (view genes)	5 out of 211 genes, 2.4%	74 out of 7570 genes, 1.0%	1
response to hexose (view genes)	2 out of 211 genes, 0.9%	14 out of 7570 genes, 0.2%	1
response to far red light (view genes)	2 out of 211 genes, 0.9%	14 out of 7570 genes, 0.2%	1
response to monosaccharide (view genes)	2 out of 211 genes, 0.9%	14 out of 7570 genes, 0.2%	1
negative regulation of cell differentiation (view genes)	2 out of 211 genes, 0.9%	14 out of 7570 genes, 0.2%	1
system development (view genes)	16 out of 211 genes, 7.6%	374 out of 7570 genes, 4.9%	1
photorespiration (view genes)	3 out of 211 genes, 1.4%	32 out of 7570 genes, 0.4%	1
embryo development ending in seed dormancy (view genes)	5 out of 211 genes, 2.4%	76 out of 7570 genes, 1.0%	1
chloroplast organization (view genes)	3 out of 211 genes, 1.4%	33 out of 7570 genes, 0.4%	1
lipid localization (view genes)	3 out of 211 genes, 1.4%	33 out of 7570 genes, 0.4%	1
response to organic substance (view genes)	16 out of 211 genes, 7.6%	379 out of 7570 genes, 5.0%	1
auxin polar transport (view genes)	2 out of 211 genes, 0.9%	15 out of 7570 genes, 0.2%	1
trichoblast differentiation (view genes)	4 out of 211 genes, 1.9%	55 out of 7570 genes, 0.7%	1
cell maturation (view genes)	4 out of 211 genes, 1.9%	55 out of 7570 genes, 0.7%	1
trichoblast maturation (view genes)	4 out of 211 genes, 1.9%	55 out of 7570 genes, 0.7%	1
root hair cell differentiation (view genes)	4 out of 211 genes, 1.9%	55 out of 7570 genes, 0.7%	1
regulation of nucleobase-containing compound metabolic process (view genes)	16 out of 211 genes, 7.6%	382 out of 7570 genes, 5.0%	1
cell differentiation (view genes)	8 out of 211 genes, 3.8%	156 out of 7570 genes, 2.1%	1
seed germination (view genes)	2 out of 211 genes, 0.9%	16 out of 7570 genes, 0.2%	1
seed dormancy process (view genes)	2 out of 211 genes, 0.9%	16 out of 7570 genes, 0.2%	1
dormancy process (view genes)	2 out of 211 genes, 0.9%	16 out of 7570 genes, 0.2%	1
meiotic chromosome segregation (view genes)	2 out of 211 genes, 0.9%	16 out of 7570 genes, 0.2%	1
chromosome segregation (view genes)	3 out of 211 genes, 1.4%	35 out of 7570 genes, 0.5%	1
meiotic nuclear division (view genes)	3 out of 211 genes, 1.4%	35 out of 7570 genes, 0.5%	1
regulation of biosynthetic process (view genes)	16 out of 211 genes, 7.6%	387 out of 7570 genes, 5.1%	1
hormone metabolic process (view genes)	4 out of 211 genes, 1.9%	57 out of 7570 genes, 0.8%	1
cellular carbohydrate metabolic process (view genes)	10 out of 211 genes, 4.7%	215 out of 7570 genes, 2.8%	1
root epidermal cell differentiation (view genes)	4 out of 211 genes, 1.9%	58 out of 7570 genes, 0.8%	1
post-embryonic morphogenesis (view genes)	3 out of 211 genes, 1.4%	36 out of 7570 genes, 0.5%	1
response to sucrose (view genes)	2 out of 211 genes, 0.9%	17 out of 7570 genes, 0.2%	1
response to disaccharide (view genes)	2 out of 211 genes, 0.9%	17 out of 7570 genes, 0.2%	1
auxin transport (view genes)	2 out of 211 genes, 0.9%	17 out of 7570 genes, 0.2%	1
fatty acid beta-oxidation (view genes)	3 out of 211 genes, 1.4%	37 out of 7570 genes, 0.5%	1
regulation of organelle organization (view genes)	3 out of 211 genes, 1.4%	37 out of 7570 genes, 0.5%	1
hormone transport (view genes)	2 out of 211 genes, 0.9%	18 out of 7570 genes, 0.2%	1
fatty acid oxidation (view genes)	3 out of 211 genes, 1.4%	38 out of 7570 genes, 0.5%	1
secondary metabolite biosynthetic process (view genes)	3 out of 211 genes, 1.4%	38 out of 7570 genes, 0.5%	1
multicellular organismal reproductive process (view genes)	3 out of 211 genes, 1.4%	38 out of 7570 genes, 0.5%	1
regulation of macromolecule biosynthetic process (view genes)	15 out of 211 genes, 7.1%	370 out of 7570 genes, 4.9%	1
regulation of cellular macromolecule biosynthetic process (view genes)	15 out of 211 genes, 7.1%	370 out of 7570 genes, 4.9%	1
single-organism membrane organization (view genes)	4 out of 211 genes, 1.9%	62 out of 7570 genes, 0.8%	1
fatty acid catabolic process (view genes)	3 out of 211 genes, 1.4%	39 out of 7570 genes, 0.5%	1
lipid oxidation (view genes)	3 out of 211 genes, 1.4%	39 out of 7570 genes, 0.5%	1
cell development (view genes)	6 out of 211 genes, 2.8%	113 out of 7570 genes, 1.5%	1
regulation of transcription, DNA-templated (view genes)	14 out of 211 genes, 6.6%	342 out of 7570 genes, 4.5%	1
regulation of nucleic acid-templated transcription (view genes)	14 out of 211 genes, 6.6%	342 out of 7570 genes, 4.5%	1
regulation of RNA biosynthetic process (view genes)	14 out of 211 genes, 6.6%	342 out of 7570 genes, 4.5%	1
cytokinin metabolic process (view genes)	2 out of 211 genes, 0.9%	19 out of 7570 genes, 0.3%	1
regulation of chromosome organization (view genes)	2 out of 211 genes, 0.9%	19 out of 7570 genes, 0.3%	1
seedling development (view genes)	2 out of 211 genes, 0.9%	19 out of 7570 genes, 0.3%	1
regulation of RNA metabolic process (view genes)	14 out of 211 genes, 6.6%	344 out of 7570 genes, 4.5%	1
carbohydrate transport (view genes)	3 out of 211 genes, 1.4%	40 out of 7570 genes, 0.5%	1
photosynthesis (view genes)	5 out of 211 genes, 2.4%	89 out of 7570 genes, 1.2%	1
secondary metabolic process (view genes)	5 out of 211 genes, 2.4%	89 out of 7570 genes, 1.2%	1
vegetative to reproductive phase transition of meristem (view genes)	3 out of 211 genes, 1.4%	41 out of 7570 genes, 0.5%	1
monocarboxylic acid catabolic process (view genes)	3 out of 211 genes, 1.4%	41 out of 7570 genes, 0.5%	1
response to blue light (view genes)	2 out of 211 genes, 0.9%	20 out of 7570 genes, 0.3%	1
auxin metabolic process (view genes)	2 out of 211 genes, 0.9%	20 out of 7570 genes, 0.3%	1
response to red light (view genes)	2 out of 211 genes, 0.9%	20 out of 7570 genes, 0.3%	1
hyperosmotic salinity response (view genes)	2 out of 211 genes, 0.9%	20 out of 7570 genes, 0.3%	1
maintenance of location (view genes)	2 out of 211 genes, 0.9%	20 out of 7570 genes, 0.3%	1
membrane organization (view genes)	4 out of 211 genes, 1.9%	65 out of 7570 genes, 0.9%	1
terpenoid biosynthetic process (view genes)	3 out of 211 genes, 1.4%	42 out of 7570 genes, 0.6%	1
response to stress (view genes)	28 out of 211 genes, 13.3%	793 out of 7570 genes, 10.5%	1
regulation of cellular biosynthetic process (view genes)	15 out of 211 genes, 7.1%	382 out of 7570 genes, 5.0%	1
chromatin silencing (view genes)	2 out of 211 genes, 0.9%	21 out of 7570 genes, 0.3%	1
negative regulation of gene expression, epigenetic (view genes)	2 out of 211 genes, 0.9%	21 out of 7570 genes, 0.3%	1
meiotic cell cycle (view genes)	3 out of 211 genes, 1.4%	43 out of 7570 genes, 0.6%	1
developmental maturation (view genes)	4 out of 211 genes, 1.9%	68 out of 7570 genes, 0.9%	1
lipid modification (view genes)	4 out of 211 genes, 1.9%	68 out of 7570 genes, 0.9%	1
glucose catabolic process (view genes)	3 out of 211 genes, 1.4%	44 out of 7570 genes, 0.6%	1
hexose catabolic process (view genes)	3 out of 211 genes, 1.4%	44 out of 7570 genes, 0.6%	1
monosaccharide catabolic process (view genes)	3 out of 211 genes, 1.4%	44 out of 7570 genes, 0.6%	1
response to high light intensity (view genes)	2 out of 211 genes, 0.9%	22 out of 7570 genes, 0.3%	1
organ formation (view genes)	2 out of 211 genes, 0.9%	22 out of 7570 genes, 0.3%	1
regulation of primary metabolic process (view genes)	18 out of 211 genes, 8.5%	482 out of 7570 genes, 6.4%	1
fatty acid metabolic process (view genes)	6 out of 211 genes, 2.8%	122 out of 7570 genes, 1.6%	1
seed development (view genes)	5 out of 211 genes, 2.4%	95 out of 7570 genes, 1.3%	1
hexose metabolic process (view genes)	5 out of 211 genes, 2.4%	96 out of 7570 genes, 1.3%	1
root hair elongation (view genes)	3 out of 211 genes, 1.4%	45 out of 7570 genes, 0.6%	1
root hair cell development (view genes)	3 out of 211 genes, 1.4%	45 out of 7570 genes, 0.6%	1
response to oxygen-containing compound (view genes)	13 out of 211 genes, 6.2%	331 out of 7570 genes, 4.4%	1
branched-chain amino acid metabolic process (view genes)	2 out of 211 genes, 0.9%	23 out of 7570 genes, 0.3%	1
response to red or far red light (view genes)	4 out of 211 genes, 1.9%	71 out of 7570 genes, 0.9%	1
cellular metabolic compound salvage (view genes)	3 out of 211 genes, 1.4%	46 out of 7570 genes, 0.6%	1
cellular lipid catabolic process (view genes)	3 out of 211 genes, 1.4%	46 out of 7570 genes, 0.6%	1
terpenoid metabolic process (view genes)	3 out of 211 genes, 1.4%	47 out of 7570 genes, 0.6%	1
response to hydrogen peroxide (view genes)	2 out of 211 genes, 0.9%	24 out of 7570 genes, 0.3%	1
single-organism carbohydrate metabolic process (view genes)	15 out of 211 genes, 7.1%	398 out of 7570 genes, 5.3%	1
shoot system development (view genes)	7 out of 211 genes, 3.3%	156 out of 7570 genes, 2.1%	1
regulation of cellular metabolic process (view genes)	18 out of 211 genes, 8.5%	498 out of 7570 genes, 6.6%	1
translational initiation (view genes)	3 out of 211 genes, 1.4%	50 out of 7570 genes, 0.7%	1
plastid organization (view genes)	3 out of 211 genes, 1.4%	50 out of 7570 genes, 0.7%	1
transcription, DNA-templated (view genes)	6 out of 211 genes, 2.8%	132 out of 7570 genes, 1.7%	1
growth (view genes)	6 out of 211 genes, 2.8%	132 out of 7570 genes, 1.7%	1
nucleic acid-templated transcription (view genes)	6 out of 211 genes, 2.8%	132 out of 7570 genes, 1.7%	1
sexual reproduction (view genes)	2 out of 211 genes, 0.9%	26 out of 7570 genes, 0.3%	1
cellular hormone metabolic process (view genes)	2 out of 211 genes, 0.9%	26 out of 7570 genes, 0.3%	1
RNA biosynthetic process (view genes)	6 out of 211 genes, 2.8%	133 out of 7570 genes, 1.8%	1
multicellular organismal process (view genes)	20 out of 211 genes, 9.5%	571 out of 7570 genes, 7.5%	1
response to hormone (view genes)	10 out of 211 genes, 4.7%	254 out of 7570 genes, 3.4%	1
alcohol metabolic process (view genes)	4 out of 211 genes, 1.9%	78 out of 7570 genes, 1.0%	1
single-multicellular organism process (view genes)	19 out of 211 genes, 9.0%	540 out of 7570 genes, 7.1%	1
regulation of macromolecule metabolic process (view genes)	17 out of 211 genes, 8.1%	476 out of 7570 genes, 6.3%	1
photosynthesis, light reaction (view genes)	3 out of 211 genes, 1.4%	52 out of 7570 genes, 0.7%	1
negative regulation of cellular process (view genes)	4 out of 211 genes, 1.9%	79 out of 7570 genes, 1.0%	1
embryo development (view genes)	5 out of 211 genes, 2.4%	107 out of 7570 genes, 1.4%	1
cellular developmental process (view genes)	8 out of 211 genes, 3.8%	196 out of 7570 genes, 2.6%	1
lignin metabolic process (view genes)	2 out of 211 genes, 0.9%	28 out of 7570 genes, 0.4%	1
negative regulation of transcription, DNA-templated (view genes)	2 out of 211 genes, 0.9%	28 out of 7570 genes, 0.4%	1
negative regulation of RNA metabolic process (view genes)	2 out of 211 genes, 0.9%	28 out of 7570 genes, 0.4%	1
negative regulation of RNA biosynthetic process (view genes)	2 out of 211 genes, 0.9%	28 out of 7570 genes, 0.4%	1
negative regulation of nucleic acid-templated transcription (view genes)	2 out of 211 genes, 0.9%	28 out of 7570 genes, 0.4%	1
response to osmotic stress (view genes)	6 out of 211 genes, 2.8%	137 out of 7570 genes, 1.8%	1
phyllome development (view genes)	5 out of 211 genes, 2.4%	109 out of 7570 genes, 1.4%	1
actin cytoskeleton organization (view genes)	2 out of 211 genes, 0.9%	29 out of 7570 genes, 0.4%	1
meiotic cell cycle process (view genes)	2 out of 211 genes, 0.9%	29 out of 7570 genes, 0.4%	1
multicellular organismal development (view genes)	18 out of 211 genes, 8.5%	517 out of 7570 genes, 6.8%	1
fruit development (view genes)	5 out of 211 genes, 2.4%	111 out of 7570 genes, 1.5%	1
response to abscisic acid (view genes)	4 out of 211 genes, 1.9%	83 out of 7570 genes, 1.1%	1
response to radiation (view genes)	8 out of 211 genes, 3.8%	202 out of 7570 genes, 2.7%	1
pentose-phosphate shunt (view genes)	2 out of 211 genes, 0.9%	30 out of 7570 genes, 0.4%	1
NADPH regeneration (view genes)	2 out of 211 genes, 0.9%	30 out of 7570 genes, 0.4%	1
starch biosynthetic process (view genes)	2 out of 211 genes, 0.9%	30 out of 7570 genes, 0.4%	1
actin filament-based process (view genes)	2 out of 211 genes, 0.9%	30 out of 7570 genes, 0.4%	1
nuclear division (view genes)	3 out of 211 genes, 1.4%	56 out of 7570 genes, 0.7%	1
regulation of gene expression (view genes)	14 out of 211 genes, 6.6%	394 out of 7570 genes, 5.2%	1
regulation of developmental growth (view genes)	3 out of 211 genes, 1.4%	57 out of 7570 genes, 0.8%	1
establishment of protein localization to organelle (view genes)	4 out of 211 genes, 1.9%	85 out of 7570 genes, 1.1%	1
DNA repair (view genes)	5 out of 211 genes, 2.4%	115 out of 7570 genes, 1.5%	1
RNA splicing (view genes)	3 out of 211 genes, 1.4%	58 out of 7570 genes, 0.8%	1
response to chemical (view genes)	22 out of 211 genes, 10.4%	661 out of 7570 genes, 8.7%	1
response to endogenous stimulus (view genes)	10 out of 211 genes, 4.7%	270 out of 7570 genes, 3.6%	1
cellular response to DNA damage stimulus (view genes)	5 out of 211 genes, 2.4%	116 out of 7570 genes, 1.5%	1
regulation of metabolic process (view genes)	20 out of 211 genes, 9.5%	596 out of 7570 genes, 7.9%	1
anatomical structure development (view genes)	18 out of 211 genes, 8.5%	530 out of 7570 genes, 7.0%	1
microtubule-based movement (view genes)	2 out of 211 genes, 0.9%	32 out of 7570 genes, 0.4%	1
gene silencing by RNA (view genes)	2 out of 211 genes, 0.9%	32 out of 7570 genes, 0.4%	1
organonitrogen compound catabolic process (view genes)	9 out of 211 genes, 4.3%	241 out of 7570 genes, 3.2%	1
monosaccharide metabolic process (view genes)	5 out of 211 genes, 2.4%	118 out of 7570 genes, 1.6%	1
NADP metabolic process (view genes)	2 out of 211 genes, 0.9%	33 out of 7570 genes, 0.4%	1
cellular component movement (view genes)	2 out of 211 genes, 0.9%	33 out of 7570 genes, 0.4%	1
negative regulation of biosynthetic process (view genes)	2 out of 211 genes, 0.9%	33 out of 7570 genes, 0.4%	1
negative regulation of macromolecule biosynthetic process (view genes)	2 out of 211 genes, 0.9%	33 out of 7570 genes, 0.4%	1
negative regulation of cellular biosynthetic process (view genes)	2 out of 211 genes, 0.9%	33 out of 7570 genes, 0.4%	1
negative regulation of cellular macromolecule biosynthetic process (view genes)	2 out of 211 genes, 0.9%	33 out of 7570 genes, 0.4%	1
lipid catabolic process (view genes)	3 out of 211 genes, 1.4%	61 out of 7570 genes, 0.8%	1
regulation of growth (view genes)	3 out of 211 genes, 1.4%	61 out of 7570 genes, 0.8%	1
hyperosmotic response (view genes)	2 out of 211 genes, 0.9%	34 out of 7570 genes, 0.4%	1
response to light intensity (view genes)	2 out of 211 genes, 0.9%	34 out of 7570 genes, 0.4%	1
negative regulation of nucleobase-containing compound metabolic process (view genes)	2 out of 211 genes, 0.9%	34 out of 7570 genes, 0.4%	1
negative regulation of nitrogen compound metabolic process (view genes)	2 out of 211 genes, 0.9%	34 out of 7570 genes, 0.4%	1
regulation of cellular component organization (view genes)	3 out of 211 genes, 1.4%	62 out of 7570 genes, 0.8%	1
response to salt stress (view genes)	5 out of 211 genes, 2.4%	122 out of 7570 genes, 1.6%	1
protein localization to organelle (view genes)	4 out of 211 genes, 1.9%	92 out of 7570 genes, 1.2%	1
photomorphogenesis (view genes)	2 out of 211 genes, 0.9%	35 out of 7570 genes, 0.5%	1
response to ethylene (view genes)	2 out of 211 genes, 0.9%	35 out of 7570 genes, 0.5%	1
carbohydrate derivative catabolic process (view genes)	7 out of 211 genes, 3.3%	186 out of 7570 genes, 2.5%	1
cellulose metabolic process (view genes)	2 out of 211 genes, 0.9%	36 out of 7570 genes, 0.5%	1
chemical homeostasis (view genes)	2 out of 211 genes, 0.9%	36 out of 7570 genes, 0.5%	1
alpha-amino acid catabolic process (view genes)	2 out of 211 genes, 0.9%	36 out of 7570 genes, 0.5%	1
small molecule catabolic process (view genes)	4 out of 211 genes, 1.9%	94 out of 7570 genes, 1.2%	1
biological regulation (view genes)	38 out of 211 genes, 18.0%	1233 out of 7570 genes, 16.3%	1
gene silencing (view genes)	2 out of 211 genes, 0.9%	37 out of 7570 genes, 0.5%	1
anatomical structure formation involved in morphogenesis (view genes)	2 out of 211 genes, 0.9%	37 out of 7570 genes, 0.5%	1
cellular amino acid catabolic process (view genes)	2 out of 211 genes, 0.9%	38 out of 7570 genes, 0.5%	1
protein import (view genes)	2 out of 211 genes, 0.9%	38 out of 7570 genes, 0.5%	1
organelle organization (view genes)	13 out of 211 genes, 6.2%	390 out of 7570 genes, 5.2%	1
proteolysis (view genes)	12 out of 211 genes, 5.7%	357 out of 7570 genes, 4.7%	1
organelle fission (view genes)	3 out of 211 genes, 1.4%	68 out of 7570 genes, 0.9%	1
regulation of meristem growth (view genes)	2 out of 211 genes, 0.9%	39 out of 7570 genes, 0.5%	1
hormone biosynthetic process (view genes)	2 out of 211 genes, 0.9%	39 out of 7570 genes, 0.5%	1
response to light stimulus (view genes)	7 out of 211 genes, 3.3%	194 out of 7570 genes, 2.6%	1
single organism reproductive process (view genes)	8 out of 211 genes, 3.8%	229 out of 7570 genes, 3.0%	1
reproductive process (view genes)	10 out of 211 genes, 4.7%	295 out of 7570 genes, 3.9%	1
pyridine nucleotide metabolic process (view genes)	2 out of 211 genes, 0.9%	41 out of 7570 genes, 0.5%	1
nicotinamide nucleotide metabolic process (view genes)	2 out of 211 genes, 0.9%	41 out of 7570 genes, 0.5%	1
response to karrikin (view genes)	2 out of 211 genes, 0.9%	42 out of 7570 genes, 0.6%	1
developmental cell growth (view genes)	3 out of 211 genes, 1.4%	73 out of 7570 genes, 1.0%	1
cellular glucan metabolic process (view genes)	5 out of 211 genes, 2.4%	137 out of 7570 genes, 1.8%	1
glucan metabolic process (view genes)	5 out of 211 genes, 2.4%	137 out of 7570 genes, 1.8%	1
nucleobase-containing compound biosynthetic process (view genes)	9 out of 211 genes, 4.3%	269 out of 7570 genes, 3.6%	1
cell cycle process (view genes)	4 out of 211 genes, 1.9%	105 out of 7570 genes, 1.4%	1
organic cyclic compound biosynthetic process (view genes)	15 out of 211 genes, 7.1%	472 out of 7570 genes, 6.2%	1
proteasomal protein catabolic process (view genes)	2 out of 211 genes, 0.9%	43 out of 7570 genes, 0.6%	1
negative regulation of biological process (view genes)	6 out of 211 genes, 2.8%	171 out of 7570 genes, 2.3%	1
homeostatic process (view genes)	4 out of 211 genes, 1.9%	106 out of 7570 genes, 1.4%	1
developmental growth (view genes)	4 out of 211 genes, 1.9%	106 out of 7570 genes, 1.4%	1
cell cycle (view genes)	5 out of 211 genes, 2.4%	139 out of 7570 genes, 1.8%	1
organic hydroxy compound metabolic process (view genes)	5 out of 211 genes, 2.4%	139 out of 7570 genes, 1.8%	1
response to reactive oxygen species (view genes)	2 out of 211 genes, 0.9%	44 out of 7570 genes, 0.6%	1
cellular response to chemical stimulus (view genes)	6 out of 211 genes, 2.8%	173 out of 7570 genes, 2.3%	1
single-organism developmental process (view genes)	18 out of 211 genes, 8.5%	581 out of 7570 genes, 7.7%	1
single-organism carbohydrate catabolic process (view genes)	4 out of 211 genes, 1.9%	108 out of 7570 genes, 1.4%	1
regulation of meristem development (view genes)	2 out of 211 genes, 0.9%	45 out of 7570 genes, 0.6%	1
organic acid catabolic process (view genes)	3 out of 211 genes, 1.4%	77 out of 7570 genes, 1.0%	1
multi-organism reproductive process (view genes)	3 out of 211 genes, 1.4%	77 out of 7570 genes, 1.0%	1
carboxylic acid catabolic process (view genes)	3 out of 211 genes, 1.4%	77 out of 7570 genes, 1.0%	1
single-organism cellular localization (view genes)	4 out of 211 genes, 1.9%	110 out of 7570 genes, 1.5%	1
meristem maintenance (view genes)	2 out of 211 genes, 0.9%	46 out of 7570 genes, 0.6%	1
negative regulation of cellular metabolic process (view genes)	2 out of 211 genes, 0.9%	46 out of 7570 genes, 0.6%	1
cell division (view genes)	3 out of 211 genes, 1.4%	78 out of 7570 genes, 1.0%	1
regulation of cellular process (view genes)	29 out of 211 genes, 13.7%	971 out of 7570 genes, 12.8%	1
protein targeting (view genes)	4 out of 211 genes, 1.9%	111 out of 7570 genes, 1.5%	1
localization (view genes)	36 out of 211 genes, 17.1%	1218 out of 7570 genes, 16.1%	1
disaccharide metabolic process (view genes)	2 out of 211 genes, 0.9%	47 out of 7570 genes, 0.6%	1
positive regulation of biosynthetic process (view genes)	2 out of 211 genes, 0.9%	47 out of 7570 genes, 0.6%	1
pyridine-containing compound metabolic process (view genes)	2 out of 211 genes, 0.9%	47 out of 7570 genes, 0.6%	1
cell growth (view genes)	4 out of 211 genes, 1.9%	113 out of 7570 genes, 1.5%	1
response to alcohol (view genes)	4 out of 211 genes, 1.9%	113 out of 7570 genes, 1.5%	1
regulation of gene expression, epigenetic (view genes)	2 out of 211 genes, 0.9%	48 out of 7570 genes, 0.6%	1
beta-glucan metabolic process (view genes)	2 out of 211 genes, 0.9%	48 out of 7570 genes, 0.6%	1
electron transport chain (view genes)	2 out of 211 genes, 0.9%	49 out of 7570 genes, 0.6%	1
pyrimidine-containing compound biosynthetic process (view genes)	2 out of 211 genes, 0.9%	49 out of 7570 genes, 0.6%	1
establishment of localization (view genes)	35 out of 211 genes, 16.6%	1194 out of 7570 genes, 15.8%	1
ribonucleotide biosynthetic process (view genes)	3 out of 211 genes, 1.4%	82 out of 7570 genes, 1.1%	1
ribose phosphate biosynthetic process (view genes)	3 out of 211 genes, 1.4%	82 out of 7570 genes, 1.1%	1
gene expression (view genes)	19 out of 211 genes, 9.0%	633 out of 7570 genes, 8.4%	1
cellular protein localization (view genes)	7 out of 211 genes, 3.3%	218 out of 7570 genes, 2.9%	1
oxidoreduction coenzyme metabolic process (view genes)	2 out of 211 genes, 0.9%	50 out of 7570 genes, 0.7%	1
reproductive structure development (view genes)	7 out of 211 genes, 3.3%	220 out of 7570 genes, 2.9%	1
reproductive system development (view genes)	7 out of 211 genes, 3.3%	220 out of 7570 genes, 2.9%	1
cellular catabolic process (view genes)	15 out of 211 genes, 7.1%	498 out of 7570 genes, 6.6%	1
developmental process (view genes)	18 out of 211 genes, 8.5%	603 out of 7570 genes, 8.0%	1
isoprenoid biosynthetic process (view genes)	3 out of 211 genes, 1.4%	84 out of 7570 genes, 1.1%	1
starch metabolic process (view genes)	2 out of 211 genes, 0.9%	51 out of 7570 genes, 0.7%	1
dephosphorylation (view genes)	2 out of 211 genes, 0.9%	51 out of 7570 genes, 0.7%	1
cellular polysaccharide metabolic process (view genes)	5 out of 211 genes, 2.4%	152 out of 7570 genes, 2.0%	1
cellular response to organic substance (view genes)	5 out of 211 genes, 2.4%	152 out of 7570 genes, 2.0%	1
cytoplasmic transport (view genes)	4 out of 211 genes, 1.9%	118 out of 7570 genes, 1.6%	1
single-organism catabolic process (view genes)	13 out of 211 genes, 6.2%	429 out of 7570 genes, 5.7%	1
cellular aromatic compound metabolic process (view genes)	41 out of 211 genes, 19.4%	1416 out of 7570 genes, 18.7%	1
DNA metabolic process (view genes)	12 out of 211 genes, 5.7%	395 out of 7570 genes, 5.2%	1
purine nucleoside monophosphate metabolic process (view genes)	5 out of 211 genes, 2.4%	153 out of 7570 genes, 2.0%	1
purine ribonucleoside monophosphate metabolic process (view genes)	5 out of 211 genes, 2.4%	153 out of 7570 genes, 2.0%	1
organic cyclic compound metabolic process (view genes)	42 out of 211 genes, 19.9%	1454 out of 7570 genes, 19.2%	1
purine nucleoside monophosphate biosynthetic process (view genes)	2 out of 211 genes, 0.9%	52 out of 7570 genes, 0.7%	1
purine ribonucleoside monophosphate biosynthetic process (view genes)	2 out of 211 genes, 0.9%	52 out of 7570 genes, 0.7%	1
positive regulation of cellular process (view genes)	4 out of 211 genes, 1.9%	120 out of 7570 genes, 1.6%	1
glucan biosynthetic process (view genes)	3 out of 211 genes, 1.4%	86 out of 7570 genes, 1.1%	1
polysaccharide metabolic process (view genes)	6 out of 211 genes, 2.8%	190 out of 7570 genes, 2.5%	1
response to heat (view genes)	2 out of 211 genes, 0.9%	53 out of 7570 genes, 0.7%	1
negative regulation of gene expression (view genes)	2 out of 211 genes, 0.9%	53 out of 7570 genes, 0.7%	1
post-embryonic organ development (view genes)	3 out of 211 genes, 1.4%	87 out of 7570 genes, 1.1%	1
cellular response to oxygen-containing compound (view genes)	3 out of 211 genes, 1.4%	87 out of 7570 genes, 1.1%	1
ribonucleotide metabolic process (view genes)	8 out of 211 genes, 3.8%	260 out of 7570 genes, 3.4%	1
ribose phosphate metabolic process (view genes)	8 out of 211 genes, 3.8%	260 out of 7570 genes, 3.4%	1
flower development (view genes)	3 out of 211 genes, 1.4%	88 out of 7570 genes, 1.2%	1
pyrimidine-containing compound metabolic process (view genes)	2 out of 211 genes, 0.9%	54 out of 7570 genes, 0.7%	1
cellular macromolecule localization (view genes)	7 out of 211 genes, 3.3%	227 out of 7570 genes, 3.0%	1
isoprenoid metabolic process (view genes)	3 out of 211 genes, 1.4%	89 out of 7570 genes, 1.2%	1
response to water deprivation (view genes)	3 out of 211 genes, 1.4%	89 out of 7570 genes, 1.2%	1
single-organism organelle organization (view genes)	7 out of 211 genes, 3.3%	229 out of 7570 genes, 3.0%	1
aromatic compound catabolic process (view genes)	7 out of 211 genes, 3.3%	231 out of 7570 genes, 3.1%	1
generation of precursor metabolites and energy (view genes)	6 out of 211 genes, 2.8%	196 out of 7570 genes, 2.6%	1
ribonucleoside monophosphate metabolic process (view genes)	5 out of 211 genes, 2.4%	161 out of 7570 genes, 2.1%	1
positive regulation of biological process (view genes)	5 out of 211 genes, 2.4%	161 out of 7570 genes, 2.1%	1
response to stimulus (view genes)	43 out of 211 genes, 20.4%	1513 out of 7570 genes, 20.0%	1
nucleoside monophosphate metabolic process (view genes)	5 out of 211 genes, 2.4%	162 out of 7570 genes, 2.1%	1
response to lipid (view genes)	4 out of 211 genes, 1.9%	127 out of 7570 genes, 1.7%	1
oligosaccharide metabolic process (view genes)	2 out of 211 genes, 0.9%	57 out of 7570 genes, 0.8%	1
response to oxidative stress (view genes)	4 out of 211 genes, 1.9%	128 out of 7570 genes, 1.7%	1
RNA processing (view genes)	6 out of 211 genes, 2.8%	199 out of 7570 genes, 2.6%	1
cytoskeleton organization (view genes)	3 out of 211 genes, 1.4%	93 out of 7570 genes, 1.2%	1
response to water (view genes)	3 out of 211 genes, 1.4%	93 out of 7570 genes, 1.2%	1
reproductive shoot system development (view genes)	3 out of 211 genes, 1.4%	93 out of 7570 genes, 1.2%	1
chromosome organization (view genes)	5 out of 211 genes, 2.4%	164 out of 7570 genes, 2.2%	1
aromatic compound biosynthetic process (view genes)	12 out of 211 genes, 5.7%	413 out of 7570 genes, 5.5%	1
organic cyclic compound catabolic process (view genes)	7 out of 211 genes, 3.3%	236 out of 7570 genes, 3.1%	1
organic substance catabolic process (view genes)	18 out of 211 genes, 8.5%	629 out of 7570 genes, 8.3%	1
monocarboxylic acid metabolic process (view genes)	8 out of 211 genes, 3.8%	272 out of 7570 genes, 3.6%	1
nucleotide metabolic process (view genes)	10 out of 211 genes, 4.7%	344 out of 7570 genes, 4.5%	1
negative regulation of macromolecule metabolic process (view genes)	2 out of 211 genes, 0.9%	59 out of 7570 genes, 0.8%	1
energy derivation by oxidation of organic compounds (view genes)	2 out of 211 genes, 0.9%	59 out of 7570 genes, 0.8%	1
regulation of biological process (view genes)	32 out of 211 genes, 15.2%	1131 out of 7570 genes, 14.9%	1
catabolic process (view genes)	19 out of 211 genes, 9.0%	666 out of 7570 genes, 8.8%	1
cellular lipid metabolic process (view genes)	9 out of 211 genes, 4.3%	309 out of 7570 genes, 4.1%	1
ATP metabolic process (view genes)	4 out of 211 genes, 1.9%	131 out of 7570 genes, 1.7%	1
carbohydrate catabolic process (view genes)	5 out of 211 genes, 2.4%	167 out of 7570 genes, 2.2%	1
ribonucleoside monophosphate biosynthetic process (view genes)	2 out of 211 genes, 0.9%	60 out of 7570 genes, 0.8%	1
nucleobase-containing small molecule metabolic process (view genes)	11 out of 211 genes, 5.2%	383 out of 7570 genes, 5.1%	1
purine ribonucleotide metabolic process (view genes)	7 out of 211 genes, 3.3%	240 out of 7570 genes, 3.2%	1
intracellular protein transport (view genes)	6 out of 211 genes, 2.8%	205 out of 7570 genes, 2.7%	1
nucleoside monophosphate biosynthetic process (view genes)	2 out of 211 genes, 0.9%	61 out of 7570 genes, 0.8%	1
nucleoside phosphate metabolic process (view genes)	10 out of 211 genes, 4.7%	349 out of 7570 genes, 4.6%	1
post-embryonic development (view genes)	8 out of 211 genes, 3.8%	278 out of 7570 genes, 3.7%	1
purine nucleoside triphosphate metabolic process (view genes)	6 out of 211 genes, 2.8%	206 out of 7570 genes, 2.7%	1
purine ribonucleoside triphosphate metabolic process (view genes)	6 out of 211 genes, 2.8%	206 out of 7570 genes, 2.7%	1
cell wall organization or biogenesis (view genes)	5 out of 211 genes, 2.4%	170 out of 7570 genes, 2.2%	1
purine ribonucleotide biosynthetic process (view genes)	2 out of 211 genes, 0.9%	62 out of 7570 genes, 0.8%	1
regulation of protein modification process (view genes)	2 out of 211 genes, 0.9%	62 out of 7570 genes, 0.8%	1
purine nucleoside catabolic process (view genes)	5 out of 211 genes, 2.4%	171 out of 7570 genes, 2.3%	1
purine nucleotide catabolic process (view genes)	5 out of 211 genes, 2.4%	171 out of 7570 genes, 2.3%	1
nucleoside triphosphate catabolic process (view genes)	5 out of 211 genes, 2.4%	171 out of 7570 genes, 2.3%	1
purine nucleoside triphosphate catabolic process (view genes)	5 out of 211 genes, 2.4%	171 out of 7570 genes, 2.3%	1
purine ribonucleotide catabolic process (view genes)	5 out of 211 genes, 2.4%	171 out of 7570 genes, 2.3%	1
ribonucleoside triphosphate catabolic process (view genes)	5 out of 211 genes, 2.4%	171 out of 7570 genes, 2.3%	1
purine ribonucleoside triphosphate catabolic process (view genes)	5 out of 211 genes, 2.4%	171 out of 7570 genes, 2.3%	1
ribonucleotide catabolic process (view genes)	5 out of 211 genes, 2.4%	171 out of 7570 genes, 2.3%	1
purine ribonucleoside catabolic process (view genes)	5 out of 211 genes, 2.4%	171 out of 7570 genes, 2.3%	1
heterocycle metabolic process (view genes)	38 out of 211 genes, 18.0%	1361 out of 7570 genes, 18.0%	1
developmental growth involved in morphogenesis (view genes)	3 out of 211 genes, 1.4%	99 out of 7570 genes, 1.3%	1
ribonucleoside triphosphate metabolic process (view genes)	6 out of 211 genes, 2.8%	208 out of 7570 genes, 2.7%	1
nucleoside catabolic process (view genes)	5 out of 211 genes, 2.4%	172 out of 7570 genes, 2.3%	1
nucleotide catabolic process (view genes)	5 out of 211 genes, 2.4%	172 out of 7570 genes, 2.3%	1
ribonucleoside catabolic process (view genes)	5 out of 211 genes, 2.4%	172 out of 7570 genes, 2.3%	1
purine-containing compound catabolic process (view genes)	5 out of 211 genes, 2.4%	172 out of 7570 genes, 2.3%	1
nucleoside phosphate catabolic process (view genes)	5 out of 211 genes, 2.4%	172 out of 7570 genes, 2.3%	1
transport (view genes)	33 out of 211 genes, 15.6%	1183 out of 7570 genes, 15.6%	1
cellular component organization (view genes)	19 out of 211 genes, 9.0%	679 out of 7570 genes, 9.0%	1
nucleoside triphosphate metabolic process (view genes)	6 out of 211 genes, 2.8%	209 out of 7570 genes, 2.8%	1
cellular nitrogen compound catabolic process (view genes)	6 out of 211 genes, 2.8%	209 out of 7570 genes, 2.8%	1
heterocycle catabolic process (view genes)	6 out of 211 genes, 2.8%	209 out of 7570 genes, 2.8%	1
ATP catabolic process (view genes)	3 out of 211 genes, 1.4%	100 out of 7570 genes, 1.3%	1
nucleoside monophosphate catabolic process (view genes)	3 out of 211 genes, 1.4%	100 out of 7570 genes, 1.3%	1
purine nucleoside monophosphate catabolic process (view genes)	3 out of 211 genes, 1.4%	100 out of 7570 genes, 1.3%	1
ribonucleoside monophosphate catabolic process (view genes)	3 out of 211 genes, 1.4%	100 out of 7570 genes, 1.3%	1
purine ribonucleoside monophosphate catabolic process (view genes)	3 out of 211 genes, 1.4%	100 out of 7570 genes, 1.3%	1
glycosyl compound catabolic process (view genes)	5 out of 211 genes, 2.4%	173 out of 7570 genes, 2.3%	1
cellular polysaccharide biosynthetic process (view genes)	3 out of 211 genes, 1.4%	101 out of 7570 genes, 1.3%	1
purine nucleotide metabolic process (view genes)	7 out of 211 genes, 3.3%	248 out of 7570 genes, 3.3%	1
organophosphate catabolic process (view genes)	5 out of 211 genes, 2.4%	176 out of 7570 genes, 2.3%	1
metal ion transport (view genes)	4 out of 211 genes, 1.9%	140 out of 7570 genes, 1.8%	1
nucleic acid metabolic process (view genes)	23 out of 211 genes, 10.9%	833 out of 7570 genes, 11.0%	1
heterocycle biosynthetic process (view genes)	11 out of 211 genes, 5.2%	397 out of 7570 genes, 5.2%	1
transmembrane transport (view genes)	11 out of 211 genes, 5.2%	397 out of 7570 genes, 5.2%	1
protein ubiquitination (view genes)	2 out of 211 genes, 0.9%	66 out of 7570 genes, 0.9%	1
macromolecule localization (view genes)	9 out of 211 genes, 4.3%	325 out of 7570 genes, 4.3%	1
carbohydrate biosynthetic process (view genes)	5 out of 211 genes, 2.4%	178 out of 7570 genes, 2.4%	1
single-organism localization (view genes)	24 out of 211 genes, 11.4%	871 out of 7570 genes, 11.5%	1
nucleobase-containing compound metabolic process (view genes)	33 out of 211 genes, 15.6%	1199 out of 7570 genes, 15.8%	1
cellular localization (view genes)	9 out of 211 genes, 4.3%	327 out of 7570 genes, 4.3%	1
DNA recombination (view genes)	3 out of 211 genes, 1.4%	105 out of 7570 genes, 1.4%	1
purine nucleotide biosynthetic process (view genes)	2 out of 211 genes, 0.9%	68 out of 7570 genes, 0.9%	1
response to nitrogen compound (view genes)	2 out of 211 genes, 0.9%	69 out of 7570 genes, 0.9%	1
single-organism process (view genes)	112 out of 211 genes, 53.1%	4054 out of 7570 genes, 53.6%	1
cellular protein complex assembly (view genes)	3 out of 211 genes, 1.4%	108 out of 7570 genes, 1.4%	1
floral organ development (view genes)	2 out of 211 genes, 0.9%	70 out of 7570 genes, 0.9%	1
nucleobase-containing compound catabolic process (view genes)	5 out of 211 genes, 2.4%	184 out of 7570 genes, 2.4%	1
protein modification by small protein conjugation (view genes)	2 out of 211 genes, 0.9%	72 out of 7570 genes, 1.0%	1
establishment of localization in cell (view genes)	8 out of 211 genes, 3.8%	301 out of 7570 genes, 4.0%	1
amine metabolic process (view genes)	2 out of 211 genes, 0.9%	73 out of 7570 genes, 1.0%	1
RNA metabolic process (view genes)	12 out of 211 genes, 5.7%	451 out of 7570 genes, 6.0%	1
single-organism transport (view genes)	23 out of 211 genes, 10.9%	858 out of 7570 genes, 11.3%	1
cellular component organization or biogenesis (view genes)	20 out of 211 genes, 9.5%	748 out of 7570 genes, 9.9%	1
negative regulation of metabolic process (view genes)	3 out of 211 genes, 1.4%	113 out of 7570 genes, 1.5%	1
macromolecule catabolic process (view genes)	6 out of 211 genes, 2.8%	228 out of 7570 genes, 3.0%	1
developmental process involved in reproduction (view genes)	7 out of 211 genes, 3.3%	267 out of 7570 genes, 3.5%	1
positive regulation of metabolic process (view genes)	3 out of 211 genes, 1.4%	114 out of 7570 genes, 1.5%	1
cellular nitrogen compound metabolic process (view genes)	37 out of 211 genes, 17.5%	1377 out of 7570 genes, 18.2%	1
nucleotide biosynthetic process (view genes)	3 out of 211 genes, 1.4%	116 out of 7570 genes, 1.5%	1
purine-containing compound metabolic process (view genes)	7 out of 211 genes, 3.3%	271 out of 7570 genes, 3.6%	1
cellular carbohydrate biosynthetic process (view genes)	3 out of 211 genes, 1.4%	117 out of 7570 genes, 1.5%	1
nucleoside phosphate biosynthetic process (view genes)	3 out of 211 genes, 1.4%	117 out of 7570 genes, 1.5%	1
cellular response to stress (view genes)	5 out of 211 genes, 2.4%	195 out of 7570 genes, 2.6%	1
establishment of protein localization (view genes)	7 out of 211 genes, 3.3%	275 out of 7570 genes, 3.6%	1
positive regulation of macromolecule metabolic process (view genes)	2 out of 211 genes, 0.9%	79 out of 7570 genes, 1.0%	1
purine nucleoside metabolic process (view genes)	6 out of 211 genes, 2.8%	239 out of 7570 genes, 3.2%	1
purine ribonucleoside metabolic process (view genes)	6 out of 211 genes, 2.8%	239 out of 7570 genes, 3.2%	1
pigment metabolic process (view genes)	2 out of 211 genes, 0.9%	81 out of 7570 genes, 1.1%	1
purine-containing compound biosynthetic process (view genes)	2 out of 211 genes, 0.9%	81 out of 7570 genes, 1.1%	1
protein folding (view genes)	3 out of 211 genes, 1.4%	122 out of 7570 genes, 1.6%	1
cellular nitrogen compound biosynthetic process (view genes)	10 out of 211 genes, 4.7%	394 out of 7570 genes, 5.2%	1
protein modification by small protein conjugation or removal (view genes)	2 out of 211 genes, 0.9%	82 out of 7570 genes, 1.1%	1
protein localization (view genes)	7 out of 211 genes, 3.3%	281 out of 7570 genes, 3.7%	1
polysaccharide biosynthetic process (view genes)	3 out of 211 genes, 1.4%	125 out of 7570 genes, 1.7%	1
regulation of phosphate metabolic process (view genes)	2 out of 211 genes, 0.9%	84 out of 7570 genes, 1.1%	1
regulation of phosphorus metabolic process (view genes)	2 out of 211 genes, 0.9%	84 out of 7570 genes, 1.1%	1
single-organism intracellular transport (view genes)	4 out of 211 genes, 1.9%	167 out of 7570 genes, 2.2%	1
lipid metabolic process (view genes)	11 out of 211 genes, 5.2%	440 out of 7570 genes, 5.8%	1
response to acid chemical (view genes)	5 out of 211 genes, 2.4%	209 out of 7570 genes, 2.8%	1
proteolysis involved in cellular protein catabolic process (view genes)	3 out of 211 genes, 1.4%	129 out of 7570 genes, 1.7%	1
regulation of cellular protein metabolic process (view genes)	2 out of 211 genes, 0.9%	88 out of 7570 genes, 1.2%	1
ribonucleoside metabolic process (view genes)	6 out of 211 genes, 2.8%	252 out of 7570 genes, 3.3%	1
organophosphate metabolic process (view genes)	12 out of 211 genes, 5.7%	486 out of 7570 genes, 6.4%	1
carbohydrate derivative metabolic process (view genes)	11 out of 211 genes, 5.2%	448 out of 7570 genes, 5.9%	1
intracellular transport (view genes)	6 out of 211 genes, 2.8%	253 out of 7570 genes, 3.3%	1
positive regulation of cellular metabolic process (view genes)	2 out of 211 genes, 0.9%	91 out of 7570 genes, 1.2%	1
regulation of protein metabolic process (view genes)	2 out of 211 genes, 0.9%	91 out of 7570 genes, 1.2%	1
cellular protein catabolic process (view genes)	3 out of 211 genes, 1.4%	134 out of 7570 genes, 1.8%	1
response to inorganic substance (view genes)	7 out of 211 genes, 3.3%	297 out of 7570 genes, 3.9%	1
protein complex subunit organization (view genes)	4 out of 211 genes, 1.9%	176 out of 7570 genes, 2.3%	1
cellular response to stimulus (view genes)	14 out of 211 genes, 6.6%	570 out of 7570 genes, 7.5%	1
cofactor metabolic process (view genes)	4 out of 211 genes, 1.9%	177 out of 7570 genes, 2.3%	1
multi-organism process (view genes)	7 out of 211 genes, 3.3%	299 out of 7570 genes, 3.9%	1
coenzyme metabolic process (view genes)	3 out of 211 genes, 1.4%	136 out of 7570 genes, 1.8%	1
vesicle-mediated transport (view genes)	4 out of 211 genes, 1.9%	179 out of 7570 genes, 2.4%	1
microtubule-based process (view genes)	2 out of 211 genes, 0.9%	94 out of 7570 genes, 1.2%	1
response to organic cyclic compound (view genes)	2 out of 211 genes, 0.9%	95 out of 7570 genes, 1.3%	1
gametophyte development (view genes)	2 out of 211 genes, 0.9%	95 out of 7570 genes, 1.3%	1
nucleoside metabolic process (view genes)	6 out of 211 genes, 2.8%	263 out of 7570 genes, 3.5%	1
nitrogen compound metabolic process (view genes)	42 out of 211 genes, 19.9%	1633 out of 7570 genes, 21.6%	1
organic substance transport (view genes)	10 out of 211 genes, 4.7%	430 out of 7570 genes, 5.7%	1
biosynthetic process (view genes)	40 out of 211 genes, 19.0%	1574 out of 7570 genes, 20.8%	1
carbohydrate derivative biosynthetic process (view genes)	4 out of 211 genes, 1.9%	189 out of 7570 genes, 2.5%	1
cellular macromolecule catabolic process (view genes)	3 out of 211 genes, 1.4%	146 out of 7570 genes, 1.9%	1
protein transport (view genes)	6 out of 211 genes, 2.8%	273 out of 7570 genes, 3.6%	1
ion transport (view genes)	8 out of 211 genes, 3.8%	356 out of 7570 genes, 4.7%	1
cellular macromolecular complex assembly (view genes)	3 out of 211 genes, 1.4%	148 out of 7570 genes, 2.0%	1
glycosyl compound metabolic process (view genes)	6 out of 211 genes, 2.8%	278 out of 7570 genes, 3.7%	1
single-organism cellular process (view genes)	70 out of 211 genes, 33.2%	2696 out of 7570 genes, 35.6%	1
protein complex assembly (view genes)	3 out of 211 genes, 1.4%	150 out of 7570 genes, 2.0%	1
macromolecule metabolic process (view genes)	62 out of 211 genes, 29.4%	2404 out of 7570 genes, 31.8%	1
protein complex biogenesis (view genes)	3 out of 211 genes, 1.4%	151 out of 7570 genes, 2.0%	1
protein catabolic process (view genes)	3 out of 211 genes, 1.4%	152 out of 7570 genes, 2.0%	1
cellular component assembly (view genes)	4 out of 211 genes, 1.9%	196 out of 7570 genes, 2.6%	1
ubiquitin-dependent protein catabolic process (view genes)	2 out of 211 genes, 0.9%	109 out of 7570 genes, 1.4%	1
modification-dependent protein catabolic process (view genes)	2 out of 211 genes, 0.9%	109 out of 7570 genes, 1.4%	1
modification-dependent macromolecule catabolic process (view genes)	2 out of 211 genes, 0.9%	109 out of 7570 genes, 1.4%	1
cation transport (view genes)	5 out of 211 genes, 2.4%	244 out of 7570 genes, 3.2%	1
cell wall organization (view genes)	2 out of 211 genes, 0.9%	111 out of 7570 genes, 1.5%	1
macromolecular complex assembly (view genes)	3 out of 211 genes, 1.4%	160 out of 7570 genes, 2.1%	1
hormone-mediated signaling pathway (view genes)	2 out of 211 genes, 0.9%	114 out of 7570 genes, 1.5%	1
primary metabolic process (view genes)	97 out of 211 genes, 46.0%	3713 out of 7570 genes, 49.0%	1
cellular response to hormone stimulus (view genes)	2 out of 211 genes, 0.9%	116 out of 7570 genes, 1.5%	1
ion transmembrane transport (view genes)	2 out of 211 genes, 0.9%	116 out of 7570 genes, 1.5%	1
cellular response to endogenous stimulus (view genes)	2 out of 211 genes, 0.9%	116 out of 7570 genes, 1.5%	1
organophosphate biosynthetic process (view genes)	4 out of 211 genes, 1.9%	209 out of 7570 genes, 2.8%	1
external encapsulating structure organization (view genes)	2 out of 211 genes, 0.9%	117 out of 7570 genes, 1.5%	1
signaling (view genes)	8 out of 211 genes, 3.8%	382 out of 7570 genes, 5.0%	1
single organism signaling (view genes)	8 out of 211 genes, 3.8%	382 out of 7570 genes, 5.0%	1
cellular macromolecule biosynthetic process (view genes)	16 out of 211 genes, 7.6%	715 out of 7570 genes, 9.4%	1
translation (view genes)	6 out of 211 genes, 2.8%	305 out of 7570 genes, 4.0%	1
macromolecular complex subunit organization (view genes)	5 out of 211 genes, 2.4%	267 out of 7570 genes, 3.5%	1
lipid biosynthetic process (view genes)	4 out of 211 genes, 1.9%	222 out of 7570 genes, 2.9%	1
cell communication (view genes)	9 out of 211 genes, 4.3%	441 out of 7570 genes, 5.8%	1
organonitrogen compound metabolic process (view genes)	19 out of 211 genes, 9.0%	853 out of 7570 genes, 11.3%	1
single-organism metabolic process (view genes)	67 out of 211 genes, 31.8%	2679 out of 7570 genes, 35.4%	1
cellular macromolecule metabolic process (view genes)	52 out of 211 genes, 24.6%	2127 out of 7570 genes, 28.1%	1
macromolecule biosynthetic process (view genes)	16 out of 211 genes, 7.6%	744 out of 7570 genes, 9.8%	1
signal transduction (view genes)	7 out of 211 genes, 3.3%	370 out of 7570 genes, 4.9%	1
metabolic process (view genes)	148 out of 211 genes, 70.1%	5582 out of 7570 genes, 73.7%	1
cellular component biogenesis (view genes)	5 out of 211 genes, 2.4%	288 out of 7570 genes, 3.8%	1
ncRNA metabolic process (view genes)	2 out of 211 genes, 0.9%	142 out of 7570 genes, 1.9%	1
cellular biosynthetic process (view genes)	32 out of 211 genes, 15.2%	1402 out of 7570 genes, 18.5%	1
regulation of catalytic activity (view genes)	2 out of 211 genes, 0.9%	146 out of 7570 genes, 1.9%	1
organic substance metabolic process (view genes)	102 out of 211 genes, 48.3%	4010 out of 7570 genes, 53.0%	1
methylation (view genes)	3 out of 211 genes, 1.4%	203 out of 7570 genes, 2.7%	1
regulation of molecular function (view genes)	2 out of 211 genes, 0.9%	154 out of 7570 genes, 2.0%	1
response to external biotic stimulus (view genes)	3 out of 211 genes, 1.4%	209 out of 7570 genes, 2.8%	1
response to other organism (view genes)	3 out of 211 genes, 1.4%	209 out of 7570 genes, 2.8%	1
response to cadmium ion (view genes)	2 out of 211 genes, 0.9%	160 out of 7570 genes, 2.1%	1
response to external stimulus (view genes)	5 out of 211 genes, 2.4%	317 out of 7570 genes, 4.2%	1
single-organism biosynthetic process (view genes)	16 out of 211 genes, 7.6%	807 out of 7570 genes, 10.7%	1
response to biotic stimulus (view genes)	3 out of 211 genes, 1.4%	228 out of 7570 genes, 3.0%	1
protein metabolic process (view genes)	33 out of 211 genes, 15.6%	1515 out of 7570 genes, 20.0%	1
phosphate-containing compound metabolic process (view genes)	26 out of 211 genes, 12.3%	1237 out of 7570 genes, 16.3%	1
response to metal ion (view genes)	2 out of 211 genes, 0.9%	178 out of 7570 genes, 2.4%	1
phosphorus metabolic process (view genes)	26 out of 211 genes, 12.3%	1251 out of 7570 genes, 16.5%	1
defense response (view genes)	2 out of 211 genes, 0.9%	183 out of 7570 genes, 2.4%	1
small molecule metabolic process (view genes)	22 out of 211 genes, 10.4%	1095 out of 7570 genes, 14.5%	1
cellular metabolic process (view genes)	91 out of 211 genes, 43.1%	3728 out of 7570 genes, 49.2%	1
organic substance biosynthetic process (view genes)	30 out of 211 genes, 14.2%	1434 out of 7570 genes, 18.9%	1
carboxylic acid metabolic process (view genes)	10 out of 211 genes, 4.7%	597 out of 7570 genes, 7.9%	1
alpha-amino acid metabolic process (view genes)	2 out of 211 genes, 0.9%	196 out of 7570 genes, 2.6%	1
oxoacid metabolic process (view genes)	10 out of 211 genes, 4.7%	611 out of 7570 genes, 8.1%	1
organic acid metabolic process (view genes)	10 out of 211 genes, 4.7%	613 out of 7570 genes, 8.1%	1
cellular amino acid metabolic process (view genes)	4 out of 211 genes, 1.9%	322 out of 7570 genes, 4.3%	1
phosphorylation (view genes)	13 out of 211 genes, 6.2%	766 out of 7570 genes, 10.1%	1
cellular process (view genes)	118 out of 211 genes, 55.9%	4772 out of 7570 genes, 63.0%	1
cellular protein metabolic process (view genes)	24 out of 211 genes, 11.4%	1275 out of 7570 genes, 16.8%	1
organonitrogen compound biosynthetic process (view genes)	5 out of 211 genes, 2.4%	408 out of 7570 genes, 5.4%	1
protein phosphorylation (view genes)	5 out of 211 genes, 2.4%	409 out of 7570 genes, 5.4%	1
cellular protein modification process (view genes)	11 out of 211 genes, 5.2%	741 out of 7570 genes, 9.8%	1
protein modification process (view genes)	11 out of 211 genes, 5.2%	741 out of 7570 genes, 9.8%	1
organic acid biosynthetic process (view genes)	2 out of 211 genes, 0.9%	262 out of 7570 genes, 3.5%	1
carboxylic acid biosynthetic process (view genes)	2 out of 211 genes, 0.9%	262 out of 7570 genes, 3.5%	1
macromolecule modification (view genes)	12 out of 211 genes, 5.7%	821 out of 7570 genes, 10.8%	1
small molecule biosynthetic process (view genes)	2 out of 211 genes, 0.9%	328 out of 7570 genes, 4.3%	1

## Sheet: pathway
Full pathway analysis result
	Pathway	DEGs with pathway annotation (451)	All genes with pathway annotation (15877)	Pvalue	Qvalue	Pathway ID
1	RNA polymerase	16 (3.55%)	183 (1.15%)	6.87952e-05	0.00681073	ko03020
2	Pyrimidine metabolism	20 (4.43%)	317 (2%)	0.000765175	0.0320442	ko00240
3	Purine metabolism	21 (4.66%)	347 (2.19%)	0.000971037	0.0320442	ko00230
4	Cutin, suberine and wax biosynthesis	9 (2%)	101 (0.64%)	0.00230822	0.0571285	ko00073
5	Stilbenoid, diarylheptanoid and gingerol biosynthesis	12 (2.66%)	189 (1.19%)	0.00787335	0.132935	ko00945
6	Carbon fixation in photosynthetic organisms	8 (1.77%)	101 (0.64%)	0.00805664	0.132935	ko00710
7	Limonene and pinene degradation	9 (2%)	134 (0.84%)	0.0142999	0.178075	ko00903
8	Fatty acid biosynthesis	5 (1.11%)	51 (0.32%)	0.0145396	0.178075	ko00061
9	ABC transporters	11 (2.44%)	184 (1.16%)	0.0161887	0.178075	ko02010
10	Metabolic pathways	125 (27.72%)	3787 (23.85%)	0.0303654	0.300618	ko01100
11	Mismatch repair	6 (1.33%)	86 (0.54%)	0.0355836	0.320253	ko03430
12	Folate biosynthesis	3 (0.67%)	27 (0.17%)	0.040206	0.3317	ko00790
13	Benzoxazinoid biosynthesis	4 (0.89%)	48 (0.3%)	0.0468758	0.356978	ko00402
14	Pentose phosphate pathway	5 (1.11%)	74 (0.47%)	0.0591684	0.41389	ko00030
15	Pantothenate and CoA biosynthesis	4 (0.89%)	53 (0.33%)	0.0632901	0.41389	ko00770
16	Photosynthesis	4 (0.89%)	54 (0.34%)	0.0668913	0.41389	ko00195
17	Non-homologous end-joining	2 (0.44%)	18 (0.11%)	0.0913481	0.522215	ko03450
18	Tryptophan metabolism	4 (0.89%)	61 (0.38%)	0.0949481	0.522215	ko00380
19	Biosynthesis of unsaturated fatty acids	4 (0.89%)	64 (0.4%)	0.108422	0.564936	ko01040
20	Starch and sucrose metabolism	16 (3.55%)	417 (2.63%)	0.138477	0.66866	ko00500
21	Sesquiterpenoid and triterpenoid biosynthesis	3 (0.67%)	46 (0.29%)	0.141837	0.66866	ko00909
22	Ascorbate and aldarate metabolism	6 (1.33%)	128 (0.81%)	0.157307	0.707883	ko00053
23	DNA replication	5 (1.11%)	103 (0.65%)	0.169274	0.728614	ko03030
24	Glyoxylate and dicarboxylate metabolism	4 (0.89%)	80 (0.5%)	0.192547	0.730493	ko00630
25	Glucosinolate biosynthesis	2 (0.44%)	29 (0.18%)	0.198753	0.730493	ko00966
26	Flavonoid biosynthesis	9 (2%)	229 (1.44%)	0.205099	0.730493	ko00941
27	C5-Branched dibasic acid metabolism	1 (0.22%)	8 (0.05%)	0.205934	0.730493	ko00660
28	Nucleotide excision repair	6 (1.33%)	140 (0.88%)	0.208209	0.730493	ko03420
29	Plant-pathogen interaction	35 (7.76%)	1070 (6.74%)	0.213983	0.730493	ko04626
30	Homologous recombination	10 (2.22%)	265 (1.67%)	0.222818	0.7353	ko03440
31	Alanine, aspartate and glutamate metabolism	4 (0.89%)	97 (0.61%)	0.297157	0.914265	ko00250
32	Phenylpropanoid biosynthesis	12 (2.66%)	357 (2.25%)	0.316723	0.914265	ko00940
33	Base excision repair	3 (0.67%)	70 (0.44%)	0.320098	0.914265	ko03410
34	Pyruvate metabolism	5 (1.11%)	136 (0.86%)	0.343915	0.914265	ko00620
35	Cysteine and methionine metabolism	5 (1.11%)	137 (0.86%)	0.349557	0.914265	ko00270
36	Carotenoid biosynthesis	5 (1.11%)	138 (0.87%)	0.355204	0.914265	ko00906
37	Diterpenoid biosynthesis	4 (0.89%)	106 (0.67%)	0.355244	0.914265	ko00904
38	Citrate cycle (TCA cycle)	3 (0.67%)	75 (0.47%)	0.35914	0.914265	ko00020
39	Biosynthesis of secondary metabolites	66 (14.63%)	2228 (14.03%)	0.375153	0.914265	ko01110
40	Lysine degradation	2 (0.44%)	46 (0.29%)	0.377237	0.914265	ko00310
41	Glycolysis / Gluconeogenesis	7 (1.55%)	208 (1.31%)	0.378635	0.914265	ko00010
42	Sulfur relay system	1 (0.22%)	18 (0.11%)	0.404879	0.92578	ko04122
43	Other types of O-glycan biosynthesis	1 (0.22%)	20 (0.13%)	0.438247	0.92578	ko00514
44	Cyanoamino acid metabolism	4 (0.89%)	121 (0.76%)	0.451449	0.92578	ko00460
45	Isoflavonoid biosynthesis	2 (0.44%)	54 (0.34%)	0.456294	0.92578	ko00943
46	Sulfur metabolism	2 (0.44%)	54 (0.34%)	0.456294	0.92578	ko00920
47	Brassinosteroid biosynthesis	2 (0.44%)	55 (0.35%)	0.465774	0.92578	ko00905
48	Selenocompound metabolism	1 (0.22%)	22 (0.14%)	0.469748	0.92578	ko00450
49	Indole alkaloid biosynthesis	1 (0.22%)	22 (0.14%)	0.469748	0.92578	ko00901
50	Phenylalanine metabolism	5 (1.11%)	159 (1%)	0.472911	0.92578	ko00360
51	Ubiquinone and other terpenoid-quinone biosynthesis	3 (0.67%)	91 (0.57%)	0.480313	0.92578	ko00130
52	Valine, leucine and isoleucine biosynthesis	2 (0.44%)	58 (0.37%)	0.493613	0.92578	ko00290
53	Amino sugar and nucleotide sugar metabolism	5 (1.11%)	165 (1.04%)	0.50546	0.92578	ko00520
54	Ribosome	8 (1.77%)	271 (1.71%)	0.506445	0.92578	ko03010
55	Zeatin biosynthesis	11 (2.44%)	379 (2.39%)	0.514322	0.92578	ko00908
56	One carbon pool by folate	1 (0.22%)	27 (0.17%)	0.541002	0.950578	ko00670
57	Nitrogen metabolism	2 (0.44%)	67 (0.42%)	0.571384	0.950578	ko00910
58	Photosynthesis - antenna proteins	1 (0.22%)	30 (0.19%)	0.579081	0.950578	ko00196
59	Butanoate metabolism	1 (0.22%)	30 (0.19%)	0.579081	0.950578	ko00650
60	N-Glycan biosynthesis	2 (0.44%)	68 (0.43%)	0.579472	0.950578	ko00510
61	Phenylalanine, tyrosine and tryptophan biosynthesis	2 (0.44%)	69 (0.43%)	0.587448	0.950578	ko00400
62	Propanoate metabolism	2 (0.44%)	70 (0.44%)	0.595311	0.950578	ko00640
63	Glycerolipid metabolism	3 (0.67%)	111 (0.7%)	0.614592	0.952896	ko00561
64	Porphyrin and chlorophyll metabolism	2 (0.44%)	74 (0.47%)	0.625639	0.952896	ko00860
65	Protein export	2 (0.44%)	74 (0.47%)	0.625639	0.952896	ko03060
66	Circadian rhythm - mammal	1 (0.22%)	35 (0.22%)	0.635671	0.953506	ko04710
67	Regulation of autophagy	2 (0.44%)	77 (0.48%)	0.647208	0.956323	ko04140
68	Glycerophospholipid metabolism	4 (0.89%)	164 (1.03%)	0.688931	0.991763	ko00564
69	Spliceosome	10 (2.22%)	400 (2.52%)	0.70398	0.991763	ko03040
70	Peroxisome	3 (0.67%)	129 (0.81%)	0.713766	0.991763	ko04146
71	Natural killer cell mediated cytotoxicity	1 (0.22%)	45 (0.28%)	0.727086	0.991763	ko04650
72	Endocytosis	4 (0.89%)	173 (1.09%)	0.728241	0.991763	ko04144
73	Circadian rhythm - plant	3 (0.67%)	134 (0.84%)	0.737542	0.991763	ko04712
74	Fatty acid metabolism	2 (0.44%)	98 (0.62%)	0.771492	0.991763	ko00071
75	Phosphatidylinositol signaling system	2 (0.44%)	99 (0.62%)	0.776331	0.991763	ko04070
76	Steroid biosynthesis	1 (0.22%)	52 (0.33%)	0.777079	0.991763	ko00100
77	alpha-Linolenic acid metabolism	2 (0.44%)	101 (0.64%)	0.78574	0.991763	ko00592
78	Tyrosine metabolism	2 (0.44%)	102 (0.64%)	0.790313	0.991763	ko00350
79	Inositol phosphate metabolism	2 (0.44%)	108 (0.68%)	0.815983	0.991763	ko00562
80	Flavone and flavonol biosynthesis	2 (0.44%)	109 (0.69%)	0.819978	0.991763	ko00944
81	Oxidative phosphorylation	3 (0.67%)	165 (1.04%)	0.851683	0.991763	ko00190
82	Galactose metabolism	2 (0.44%)	121 (0.76%)	0.862182	0.991763	ko00052
83	Proteasome	1 (0.22%)	74 (0.47%)	0.882046	0.991763	ko03050
84	beta-Alanine metabolism	1 (0.22%)	75 (0.47%)	0.885412	0.991763	ko00410
85	SNARE interactions in vesicular transport	1 (0.22%)	77 (0.48%)	0.89186	0.991763	ko04130
86	Valine, leucine and isoleucine degradation	1 (0.22%)	81 (0.51%)	0.903689	0.991763	ko00280
87	Glutathione metabolism	2 (0.44%)	139 (0.88%)	0.908736	0.991763	ko00480
88	Pentose and glucuronate interconversions	4 (0.89%)	240 (1.51%)	0.912997	0.991763	ko00040
89	RNA transport	10 (2.22%)	532 (3.35%)	0.939504	0.991763	ko03013
90	Fructose and mannose metabolism	1 (0.22%)	102 (0.64%)	0.947601	0.991763	ko00051
91	Terpenoid backbone biosynthesis	4 (0.89%)	267 (1.68%)	0.947851	0.991763	ko00900
92	mRNA surveillance pathway	4 (0.89%)	272 (1.71%)	0.952694	0.991763	ko03015
93	Protein processing in endoplasmic reticulum	7 (1.55%)	419 (2.64%)	0.955888	0.991763	ko04141
94	Plant hormone signal transduction	16 (3.55%)	821 (5.17%)	0.960464	0.991763	ko04075
95	Glycine, serine and threonine metabolism	1 (0.22%)	116 (0.73%)	0.965095	0.991763	ko00260
96	Arginine and proline metabolism	1 (0.22%)	132 (0.83%)	0.978069	0.991763	ko00330
97	Ribosome biogenesis in eukaryotes	9 (2%)	596 (3.75%)	0.988985	0.991763	ko03008
98	RNA degradation	9 (2%)	609 (3.84%)	0.991188	0.991763	ko03018
99	Ubiquitin mediated proteolysis	3 (0.67%)	299 (1.88%)	0.991763	0.991763	ko04120
